# Supplementary material for: Floodwater Impact on Galveston Bay Phytoplankton Taxonomy, Pigment Compositionand Photo-Physiological State following Hurricane Harvey from Field and Ocean Color (Sentinel-3A OLCI) Observations
Source: Copernicus journal article supplement (doi:10.5194/bg-2018-504), 2019-01-03
Supplement: Supplementary file [file bg-2018-504-AC3-supplement.pdf]

1 **Floodwater Impact on Galveston Bay Phytoplankton Taxonomy, Pigment Composition and Photo-**  
2 **Physiological State following Hurricane Harvey from Field and Ocean Color (Sentinel-3A OLCI)**  
3 **Observations**

4  
5  
6  
7 **Bingqing Liu<sup>1</sup>, Eurico D'Sa<sup>1\*</sup> and Ishan Joshi<sup>1</sup>**

8  
9 <sup>1</sup>Department of Oceanography and Coastal Sciences, Louisiana State University, Baton Rouge, LA 70803,  
10 USA

11 \* Corresponding author: [ejdsa@lsu.edu](mailto:ejdsa@lsu.edu)

12  
13  
14 **Abstract**

15 Phytoplankton taxonomy, pigment composition and photo-physiological state were studied in Galveston  
16 Bay (GB), Texas (USA) following the extreme flooding associated with Hurricane Harvey (August 25–29,  
17 2017) using field and satellite ocean color observations. Percentage of chlorophyll a (Chl a) in different  
18 phytoplankton groups were determined from a semi-analytical IOP (inherent optical property) inversion  
19 algorithm. The IOP inversion algorithm revealed the dominance of freshwater species (diatom,  
20 cyanobacteria and green algae) in the bay following the hurricane passage (September 29, 2017) under  
21 low salinity conditions associated with the discharge of floodwaters into GB; 2 months after the hurricane  
22 (October 29–30, 2017), under more seasonal salinity conditions, the phytoplankton community  
23 transitioned to an increase in small sized groups such as haptophyte and prochlorophyte. Sentinel-3A  
24 OLCI-derived Chl a obtained using a red/NIR band ratio algorithm for the turbid estuarine waters was  
25 highly correlated ( $R^2 > 0.90$ ) to HPLC-derived Chl a concentrations. Long-term observations of OLCI-  
26 derived Chl a (August, 2016-December, 2017) in GB revealed that hurricane-induced Chl a declined to  
27 background mean state in late October, 2017. A Non-Negative Least Square (NNLS) inversion model was  
28 then applied to OLCI-derived Chl a maps of GB to investigate spatiotemporal variations of phytoplankton  
29 diagnostic pigments pre- and post-hurricane; results appeared consistent with extracted phytoplankton  
30 taxonomic composition derived from the IOP inversion algorithm and microplankton pictures obtained  
31 from an Imaging FlowCytobot (IFCB). OLCI-derived diagnostic pigment distributions also exhibited  
32 good agreement with HPLC measurements during both surveys, with mean  $R^2$  ranging from 0.39 for  
33 violaxanthin to 0.98 for Chl a. Environmental factors (e.g., floodwaters) combined with phytoplankton  
34 taxonomy also strongly modulated phytoplankton physiology in the bay as indicated by measurements of  
35 photosynthetic parameters with a Fluorescence Induction and Relaxation (FIRE) system. Phytoplankton in  
36 well-mixed waters (mid-bay area) exhibited maximum PSII photochemical efficiency ( $F_v/F_M$ ) and low  
37 effective absorption cross section ( $\sigma_{PSII}$ ), while the areas adjacent to the shelf (likely nutrient-limited)  
38 showed low  $F_v/F_M$  and elevated  $\sigma_{PSII}$  values. Overall, the approach using field and ocean color data  
39 combined with inversion models allowed, for the first time, an assessment of phytoplankton response to a  
40 large hurricane-related floodwater perturbation in a turbid estuarine environment based on its taxonomy,  
41 pigment composition and physiological state.

42  
43  
44  
45  
46 **Key words:** Galveston Bay, phytoplankton taxonomy, pigment composition, physiology, ocean color,  
47 chlorophyll a, Sentinel-3A OLCI  
48

## 49 1. Introduction

50 Phytoplankton, which form the basis of the aquatic food web, are crucial to marine ecosystems and play a  
51 strong role in marine biogeochemical cycling and climate change. Phytoplankton contributes  
52 approximately half of the total primary production on Earth, fixing ~50 GT of carbon into organic matter  
53 per year through photosynthesis; however, various phytoplankton taxa affect differently the carbon  
54 fixation and export (Sathyendranath et al., 2014). Chlorophyll a (Chl a), an essential phytoplankton  
55 photosynthetic pigment, has been considered a reliable indicator of phytoplankton biomass and primary  
56 productivity in aquatic systems (Bracher et al., 2015). Phytoplankton also contain several accessory  
57 pigments such as chlorophyll-b (Chl b), chlorophyll-c (Chl c), photosynthetic carotenoids (PSC) and  
58 photo-protective carotenoids (PPC) that are either involved in light harvesting, or in protecting Chl a and  
59 other sensitive pigments from photo-damage (Fishwick et al., 2006). Some of PSCs and PPCs are taxa-  
60 specific and have been considered as bio-marker pigments: e.g., fucoxanthin (PSC) for diatoms, peridinin  
61 (PPC) for certain dinoflagellates, alloxanthin (PPC) for cryptophytes, zeaxanthin (PPC) for prokaryotes  
62 (e.g. cyanobacteria), and the degradation products of Chl a, namely, divinyl Chl a and divinyl-Chl b for  
63 prochlorophyte (Jeffrey and Vest, 1997). High-Performance Liquid Chromatography (HPLC) which can  
64 efficiently detect and quantify several chemo-taxonomically significant chlorophylls and carotenoids,  
65 when coupled with these taxa-specific pigment ratios, allow phytoplankton taxonomic composition to be  
66 quantified based on a pigment concentration diagnostic procedures such as CHEMTAX (Mackey et al.,  
67 1996). Furthermore, phytoplankton pigments with distinct absorption characteristics strongly influence  
68 the light absorption by phytoplankton (Bidigare et al., 1990; Ciotti et al., 2002; Bricaud et al., 2004). As  
69 such, phytoplankton absorption spectra has been used to infer underlying pigments and also  
70 phytoplankton taxonomy by Gaussian-decomposition of (Hoepffner and Sathyendranath, 1991; Lohrenz  
71 et al., 2003; Ficek et al., 2004; Chase et al., 2013; Moisan et al., 2013; Wang et al., 2016; Moisan et al.,  
72 2017). More importantly, phytoplankton optical properties (absorption and backscattering ) bearing the  
73 imprints of different pigments and cell-size, are important contributors to reflectance in a waterbody  
74 (Gordon et al., 1988). Morel and Prieur, (1977) first reported the feasibility of calculating the  
75 phytoplankton absorption coefficients and other inherent optical properties (IOPs) from measured  
76 subsurface irradiance reflectance based on the simplified radiative transfer equation. Improvements in  
77 semi-analytical inversion algorithms to derive IOPs from in-situ and remotely sensed reflectance spectra  
78 have been reported (Roesler and Perry, 1995; Hoge and Lyon, 1996; Lee et al., 1996; Garver and Siegel,  
79 1997; Carder et al., 1999; Maritorea et al., 2002; Roesler and Boss, 2003; Chase et al., 2017). Roesler et  
80 al. (2003) further modified an earlier IOP inversion algorithm used in Roesler and Perry, (1995) by  
81 adding a set of 5 species-specific phytoplankton absorption spectra, and derived phytoplankton taxonomic  
82 composition from the field measured remote sensing reflectance.

83 Phytoplankton pigment composition varies not only between taxonomic groups but also with photo-  
84 physiological state of cells and environmental stress (e.g., light, nutrients, temperature, salinity,  
85 turbulence and stratification) (Suggett et al., 2009). The photosynthetic pigment field is an important  
86 factor influencing the magnitude of fluorescence emitted by phytoplankton, with active fluorometry  
87 commonly used to obtain estimates of phytoplankton biomass (D'Sa et al., 1997). Advanced active  
88 fluorometry termed as fast repetition rate (FRR; (Kolber et al., 1998)) and analogous techniques such as  
89 the fluorescence induction and relaxation (FIRE; Suggett et al., 2008) allows for the simultaneous  
90 measurements of the maximum PSII photochemical efficiency ( $F_v/F_M$ ; where  $F_m$  and  $F_o$  is maximum and  
91 minimum fluorescence yield and  $F_v$  is variable fluorescence obtained by subtracting  $F_o$  from  $F_m$ ) and the  
92 effective absorption cross section ( $\sigma_{PSII}$ ) of a phytoplankton population; these have been used as  
93 diagnostic indicators for the rapid assessment of phytoplankton health and photo-physiological state  
94 linked to environmental stressors. Considerable effort has been invested to achieve a deeper  
95 understanding of the impacts of environmental factors and phytoplankton taxonomy on photosynthetic  
96 performance of natural communities from field and laboratory fluorescence measurements (Kolber et al.,  
97 1988; Geider et al., 1993; Schütter et al., 1997; Behrenfeld and Kolber, 1999; D'Sa and Lohrenz, 1999;

98 Holmboe et al., 1999; Moore et al., 2003). Furthermore, knowledge of photo-physiological responses of  
99 phytoplankton in combination with information on phytoplankton taxonomic composition could provide  
100 additional insights on regional environmental conditions.

101 Synoptic mapping of aquatic ecosystems using satellite remote sensing has revolutionized our  
102 understanding of phytoplankton dynamics at various spatial and temporal scales in response to  
103 environmental variabilities and climate change. It has also provided greater understanding of biological  
104 response to large events such as hurricanes in oceanic and coastal waters (Babin et al. 2004; Acker et al.  
105 2009; D'Sa 2014; Farfan et al. 2014; Hu and Feng, 2016). Although the primary focus of ocean color  
106 sensors has been to determine the Chl a concentration and related estimates of phytoplankton primary  
107 production (Mitchell, 1994; Behrenfeld and Falkowski, 1997), more recently, several approaches have  
108 been developed based on phytoplankton optical signatures to derive spatial distributions of phytoplankton  
109 functional types (PFTs) (Alvain et al., 2005; Nair et al., 2008; Hirata et al., 2011), phytoplankton size  
110 classification (Ciotti et al., 2002; Hirata et al., 2008; Brewin et al., 2010; Devred et al., 2011), and  
111 phytoplankton accessory pigments (Pan et al., 2010; Pan et al., 2011; Moisan et al., 2013; Moisan et al.,  
112 2017; Sun et al., 2017). The basis of these satellite-based remote sensing algorithms have relied on  
113 distinct spectral contributions from phytoplankton community composition (e.g., taxonomy, size structure)  
114 to remote sensing reflectance ( $R_{rs}$ ,  $sr^{-1}$ ); however, these studies have all been confined to open ocean and  
115 shelf waters. In contrast, satellite studies of phytoplankton pigments have been limited in the optically  
116 complex estuarine waters where the influence from wetlands, rivers, and coastal ocean make  
117 phytoplankton communities highly variable and complex.

118 In this study, field bio-optical measurements and ocean color remote sensing data (Sentinel-3A OLCI)  
119 acquired in Galveston Bay, a shallow estuary along the Gulf coast (Texas, USA; Fig. 1), are used to  
120 investigate the spatial distribution of phytoplankton pigments, taxonomic composition, and their photo-  
121 physiological state following the extreme flooding of the Houston Metropolitan and surrounding areas  
122 due to Hurricane Harvey and the consequent biological impact of the floodwater discharge into the bay.  
123 The paper is organized as follows: section 2 describes the field data acquisition and laboratory processing,  
124 section 3 presents the algorithms and methods used to distinguish phytoplankton groups, retrieve spatial  
125 distribution of pigments, and calibrate phytoplankton physiological parameters. Results and discussions  
126 (section 4 and 5), and summary (section 6) addresses the main contributions and findings of this paper.

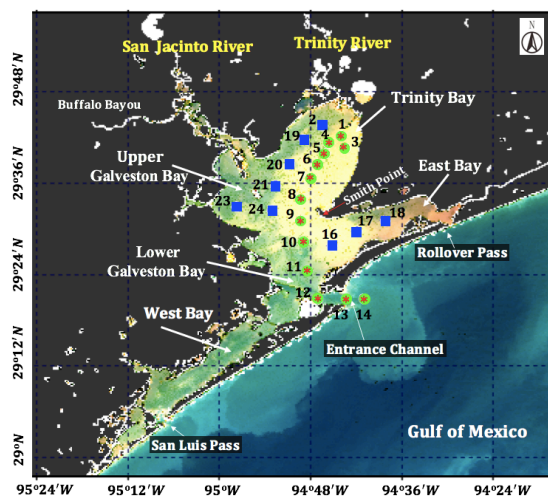

127  
128 **Figure 1.** Sentinel-3A OLCI RGB image (October 29, 2017) with locations of sampling sites in  
129 Galveston Bay acquired on September 29 (red asterisk), October 29 (green circles) and October 30 (blue  
130 solid squares), 2017, respectively.

## 131 2. Data and Methods

### 132 2.1 Study area

133 Galveston Bay (GB), a shallow water estuary (~2.1 m average depth), encompasses two major sub-  
134 estuaries: San Jacinto Estuary (also divided as Upper GB and Lower GB), and Trinity Estuary (Trinity  
135 Bay) (Fig. 1). It is located adjacent to the heavily urbanized and industrialized metropolitan areas of  
136 Houston, Texas (Dorado et al., 2015). A deep (~14 m) narrow Houston Ship Channel connects the bay to  
137 the northern Gulf of Mexico (nGoM) through a narrow entrance, the Bolivar Roads Pass. Tidal exchange  
138 between GB and the nGoM occurs through the entrance channel with diurnal tides ranging from ~0.15 to  
139 ~0.5 m. The major freshwater sources to GB are the Trinity River (55%), the San Jacinto River (16%),  
140 and Buffalo Bayou (12%) (Guthrie et al., 2012). The San Jacinto River was frequently observed to  
141 transport greater amounts of dissolved nutrients into GB than the Trinity River (Quigg, 2011); however,  
142 the negative relationship between nitrate concentrations and salinity observed in the mid-bay area  
143 (adjacent to Smith Point) (Santschi, 1995), indicated Trinity River to be a major source of nitrate in GB.  
144 The catastrophic flooding of Houston and surrounding areas associated with Hurricane Harvey resulted in  
145 strong freshwater inflows into GB from the San Jacinto River ( $>3300 \text{ m}^3\text{s}^{-1}$ ; USGS 08067650) on August  
146 29, 2017 and the Trinity River ( $>2500 \text{ m}^3\text{s}^{-1}$ ; USGS 08066500 site at Romayor, Texas) on August 30,  
147 2017, respectively. Although the discharge from the two rivers in the upstream returned to normal  
148 conditions ( $\sim 50\text{--}120 \text{ m}^3\text{s}^{-1}$ ) in about 2 weeks after the Hurricane passage, salinity remained low for over a  
149 month following the hurricane passage (D'Sa et al., 2018).

### 150 2.2 Sampling and Data Collection

151 Surface water samples were collected at a total of 34 stations during two surveys on September 29 and  
152 October 29–30, 2017 (Fig. 1). Samples at stations 1 to 14 (red asterisk on top of green circle; Fig. 1)  
153 along the Trinity River transect were collected repeatedly on September 29 and October 29, 2017,  
154 respectively. Additional 9 sampling sites (blue squares; Fig. 1) around the upper bay and in the East Bay  
155 were sampled on October 30, 2017. The surface water samples were stored in coolers and filtered on the  
156 same day. The filter pads were immediately frozen and stored in liquid nitrogen for laboratory absorption  
157 spectroscopic and HPLC measurements of the samples. An optical package equipped with a conductivity-  
158 temperature-depth recorder (Sea-Bird SBE) and a Fluorescence Induction and Relaxation System (FIRE;  
159 Satlantic Inc) was used to obtain profiles of salinity, temperature, pressure, and phytoplankton  
160 physiological parameters ( $F_V/F_M$  and  $\sigma_{PSII}$ ). Measurements of backscattering were also made at each  
161 station using the WETLabs VSF-3 (470, 530, 670 nm) backscattering sensor (D'Sa et al. 2006). Included  
162 in the optical package was also a hyperspectral downwelling spectral irradiance meter (HyperOCR,  
163 Satlantic). The irradiance data from HyperOCR were processed using Prosoft 7.7.14 and the  
164 photosynthetically Active Radiation (PAR) were estimated from the irradiance measurements. The  
165 above-water reflectance measurements were collected using a GER 1500 512iHR spectroradiometer in  
166 the 350-1050 nm spectral range. At each station, sky radiance, plate radiance, and water radiance were  
167 recorded (each repeated three times) and processed to obtain above-water remote sensing reflectance  
168 (Joshi et al., 2017). A total of 43 Sentinel-3A OLCI full resolution mode, cloud free level-1 images were  
169 obtained over GB between August 01, 2016-December 01, 2017 from the European Organization for  
170 Meteorological Satellites (EUMESAT) website and pre-processed using Sentinel-3 Toolbox Kit Module  
171 (S3TBX) version 5.0.1 in Sentinel Application Platform (SNAP). These Sentinel-3A OLCI data were  
172 further atmospherically corrected to obtain remote sensing reflectance ( $R_{rs, OLCI, sr}^{-1}$ ) using Case-2  
173 Regional Coast Color (C2RCC) module version 0.15 (Doerffer and Schiller, 2007). River discharge  
174 information during August, 2016-December, 2017 was downloaded from the USGS Water Data (USGS)  
175 for Trinity River at Romayor, Texas (USGS 08066500) and the west flank of the San Jacinto River  
176 (USGS 08067650). Individual pictures of microplankton (10 to 150  $\mu\text{m}$ ) recorded by an Imaging

177 FlowCytobot (IFCB) located at the entrance to Galveston Bay were downloaded (<http://dq-cytobot->  
178 [pc.tamug.edu/tamugifcb](http://pc.tamug.edu/tamugifcb)) for pigment validation.

### 179 2.3 Absorption Spectroscopy

180 Surface water samples were filtered through 0.2- $\mu\text{m}$  nuclepore membrane filters and the colored dissolved  
181 organic matter (CDOM) absorbance ( $A_{\text{CDOM}}$ ) were obtained using a 1-cm path length quartz cuvette on a  
182 Perkin Elmer Lambda-850 UV/VIS spectrophotometer equipped with an integrating sphere. The  
183 Quantitative Filter Technique (QFT) with 0.7- $\mu\text{m}$  GF/F filters were used to measure absorbance of  
184 particles ( $A_{\text{total}}$ ) and non-algal particles ( $A_{\text{NAP}}$ ) inside an integrating sphere at 1 nm intervals from 300 to  
185 800 nm. The absorption coefficients of CDOM ( $a_{\text{CDOM}}$ ), NAP ( $a_{\text{NAP}}$ ), particles ( $a_{\text{total}}$ ) and phytoplankton  
186 ( $a_{\text{PHY}}$ ) were calculated using the following equations:

$$187 \quad a_{\text{CDOM}}(\lambda) = 2.303 \times \frac{A_{\text{CDOM}}(\lambda)}{L} \quad \dots\dots (1)$$

188 where  $L$  is the path length in meters. The  $a_{\text{CDOM}}$  were corrected for scattering, temperature, and baseline  
189 drift by subtracting an average value of absorption between 700-750 nm for each spectrum (Joshi and  
190 D'Sa, 2015).

$$191 \quad a_{\text{total}}(\lambda) = 2.303 \times \frac{A_{\text{total}}(\lambda)}{V_{\text{filtered}}/S_{\text{filter}}} \quad \dots\dots (2)$$

$$192 \quad a_{\text{NAP}}(\lambda) = 2.303 \times \frac{A_{\text{NAP}}(\lambda)}{V_{\text{filtered}}/S_{\text{filter}}} \quad \dots\dots (3)$$

$$193 \quad a_{\text{PHY}}(\lambda) = a_{\text{total}} - a_{\text{NAP}} \quad \dots\dots (4)$$

194 where  $V_{\text{filtered}}$  is the filtered volume of sample,  $S_{\text{filter}}$  is the area of filter pads and the path length correction  
195 for filter pad was applied according to (Stramski et al., 2015).

### 196 2.4 Pigment Absorption Spectra

197 The water samples were filtered with 0.7- $\mu\text{m}$  GF/F filter. The filter pads were stored in liquid nitrogen  
198 until transferred into 30 ml vials containing 10 ml cold 96% ethanol (Ritchie, 2006). The vials were spun  
199 evenly to ensure full exposure of the filter pad to the ethanol and then kept in the refrigerator (in the dark)  
200 overnight. The pigment solutions at room-temperature were poured off from vials into 1 cm cuvette and  
201 measured on a Perkin Elmer Lambda-850 UV/VIS spectrophotometer to obtain pigment absorbance  
202 spectra ( $A_{\text{pig}}$ ), while, 90% ethanol was used as a blank (Thrane et al., 2015). The total absorption  
203 coefficients of pigments  $a_{\text{pig}}(\lambda)$  were calculated as follow:

$$204 \quad a_{\text{pig}}(\lambda) = 2.303 \times \frac{A_{\text{pig}}(\lambda)}{L} \times \left( \frac{V_{\text{ethanol}}}{V_{\text{filtered}}} \right) \quad \dots\dots (5)$$

205 where  $L$  is the path length in meters,  $V_{\text{ethanol}}$  is the volume of ethanol, and  $V_{\text{filtered}}$  is the filtered volume of  
206 the water samples.

### 207 2.5 HPLC Measurements

208 Water samples were filtered through 0.7- $\mu\text{m}$  GF/F filters and immediately frozen in liquid nitrogen for  
 209 HPLC analysis using the methods reported by Barlow et al. (1997). The detected pigments along with  
 210 their abbreviations are listed in Table 1. Diagnostic biomarker pigments are marked in bold letters (Table  
 211 1).

212 **Table 1.** Pigments information acquired from HPLC samples in Galveston Bay.

| Variable                                                                                                                                  | Primary Pigment (PPig)            | Calculation                                                       |
|-------------------------------------------------------------------------------------------------------------------------------------------|-----------------------------------|-------------------------------------------------------------------|
| Chlorophylls                                                                                                                              |                                   |                                                                   |
| [TChl a]                                                                                                                                  | Total chlorophyll a (TChl a)      | [Chlide a]+[DVChl a]+[Chl a]                                      |
| [TChl b]                                                                                                                                  | Total chlorophyll b (TChl b)      | [DVChl b]+ <b>[Chl b]</b>                                         |
| [TChl c]                                                                                                                                  | Total chlorophyll c (TChl c)      | [Chl c <sub>1</sub> ]+[Chl c <sub>2</sub> ]+[Chl c <sub>3</sub> ] |
| Carotenoids                                                                                                                               |                                   |                                                                   |
| [Caro]                                                                                                                                    | Carotenes†                        | [ $\beta\beta$ -Car]+[ $\beta\epsilon$ -Car]                      |
| <b>[Allo]</b>                                                                                                                             | <b>Alloxanthin</b>                |                                                                   |
| <b>[Buta]</b>                                                                                                                             | <b>19'-Butanoyloxyfucoxanthin</b> |                                                                   |
| [Diadino]                                                                                                                                 | Diadinoxanthin                    |                                                                   |
| [Diato]                                                                                                                                   | Diatoxanthin                      |                                                                   |
| <b>[Fuco]</b>                                                                                                                             | <b>Fucoxanthin</b>                |                                                                   |
| <b>[Hexa]</b>                                                                                                                             | <b>19'-Hexanoyloxyfucoxanthin</b> |                                                                   |
| <b>[Peri]</b>                                                                                                                             | <b>Peridinin</b>                  |                                                                   |
| <b>[Zea]</b>                                                                                                                              | <b>Zeaxanthin</b>                 |                                                                   |
| [Neo]                                                                                                                                     | Neoxanthin                        |                                                                   |
| [Lut]                                                                                                                                     | Lutein                            |                                                                   |
| [Viola]                                                                                                                                   | Violaxanthin                      |                                                                   |
| [Pras]                                                                                                                                    | Prasinoxanthin                    |                                                                   |
| [Anthera]                                                                                                                                 | Antheraxanthin                    |                                                                   |
| Note: (1) [Chl b], [Allo], [Fuco], [Peri], [Zea], [Buta] and [Hexa] are considered as diagnostic pigments for PFTs (Moisan et al., 2017). |                                   |                                                                   |
| Variable                                                                                                                                  | Pigment Sum                       | Calculation                                                       |
| [TChl]                                                                                                                                    | Total Chlorophyll (TChl)          | [TChl a]+[TChl b]+[TChl c]                                        |
| [PPC]                                                                                                                                     | Photoprotective Carotenoids (PPC) | [Allo]+[Diadino]+[Diato]+[Zea]+[Caro]+[Viola]                     |
| [PSC]                                                                                                                                     | Photosynthetic Carotenoids (PSC)  | [Buta]+[Fuco]+[Hexa]+[Peri]+[Lut]+[Pras]                          |
| [PSP]                                                                                                                                     | Photosynthetic Pigments (PSP)     | [PSC]+[TChl]                                                      |
| [AP]                                                                                                                                      | Total Accessory Pigments (AP)     | [PPC]+[PSC]+[TChl b]+[TChl c]                                     |
| [TP]                                                                                                                                      | Total Pigments (TP)               | [AP]+[TChl a]                                                     |
| [DP]                                                                                                                                      | Total Diagnostic Pigments (DP)    | [PSC]+[Allo]+[Zea]+[T Chl b]                                      |

## 213 2.6 FIRE Measurements

214 An in-situ Fluorescence Induction and Relaxation System (FIRE, Satlantic Inc.) was used to characterize  
 215 phytoplankton photosynthetic physiology during the two surveys in GB. The FIRE is based on  
 216 illuminating a sample with an intense flash of light to instantaneously saturate the reaction centers of  
 217 photosystem II (PSII); under these light conditions, reaction centers do not accept electrons and most of  
 218 the absorbed light energy is dissipated as fluorescence. The fundamental parameter measured by FIRE is

219 fluorescence yield  $F(t)$ , which is the emitted fluorescence divided by the irradiance intensity (no unit). In  
 220 contrast to strong flashes, dark adaption enables all reaction centers of PSII to be open with least  
 221 fluorescence emitted, thus, resulting in minimal fluorescence yield ( $F_0$ ). Maximum fluorescence yield ( $F_m$ )  
 222 can be obtained after sufficient irradiation when all reaction centers are closed. Maximum photochemical  
 223 efficiency, which quantify the potential of converting light to chemical energy for the PSII reaction  
 224 centers (Moore et al., 2006), was calculated as  $(F_m - F_0) / F_m = F_v / F_m$ . The functional absorption cross  
 225 section  $\sigma_{PSII}$  ( $\text{\AA}^2 \text{quantum}^{-1}$ ) measures the capability of reaction centers to absorb light from the ambient  
 226 environment. The FIRE was deployed at a slow descent rate, with 12 and 20 vertical profiles obtained  
 227 during the first and second surveys, respectively. All measurements were programmed using standard  
 228 protocols of single saturating turn-over (ST) flash saturation of PSII (Kolber et al., 1998). Flashes were  
 229 generated from highly uniform blue LEDs at 455 nm with approximately 30 nm half-bandwidth. Chl a  
 230 fluorescence was stimulated using saturating sequence of 80  $1.1 \mu\text{s}$  flashes applied at  $1 \mu\text{s}$  intervals, 8  
 231 sequences were averaged per acquisition, and the fluorescence signal was detected at 668 nm. All data  
 232 were processed using standard FIRECom software (Satlantic). In addition, samples of 0.2- $\mu\text{m}$  filtered sea  
 233 water at each station were used as 'blank' to remove the background fluorescence signals (Cullen and  
 234 Davis, 2003); in this step, the fluorescence from the filtered samples (without phytoplankton) were  
 235 subtracted from in-situ fluorescence signals to get more accurate values of  $F_v/F_m$ .

## 236 2.7 Retrieving Phytoplankton Groups from above-water $R_{rs}$

237 A fundamental relationship that links sub-surface remote-sensing reflectance ( $r_{rs}$ ) and the IOPs was  
 238 expressed using a quadratic function developed by (Gordon et al., 1988):

$$239 \quad r_{rs} = g_1 * u(\lambda) + g_2 * u(\lambda)^2; \quad u(\lambda) = \frac{b_b}{a_{total} + b_b} \quad \dots\dots (6)$$

240 where, the parameters  $g_1$  ( $\sim 0.0788$ ) and  $g_2$  ( $\sim 0.2379$ ) are values for turbid estuarine waters (Joshi and  
 241 D'Sa, 2018);  $r_{rs}$  is the sub-surface remote sensing reflectance that were obtained from above-water remote  
 242 sensing reflectance ( $R_{rs}$ ) using (Lee et al., 2002):

$$243 \quad r_{rs} = \frac{R_{rs}}{0.52 + 1.7 * R_{rs}} \quad \dots\dots (7)$$

244 The total backscattering coefficient  $b_b$  is comprised of water ( $b_{bw}$ ) and particulates including both organic  
 245 and inorganic particles ( $b_{bp}$ ), while the total absorption coefficients ( $a_{total}$ ) can be further separated into  
 246 four sub-constituents (Roesler and Perry, 1995) as indicated by:

$$247 \quad b_b = b_{bw} + b_{bp}; \quad a_{total} = a_w + a_{phy} + a_{CDOM} + a_{NAP} \quad \dots\dots (8)$$

248 where  $a_w$ ,  $a_{phy}$ ,  $a_{CDOM}$ , and  $a_{NAP}$  represent the absorption coefficients of pure water, phytoplankton, colored  
 249 dissolved organic matter and non-algal particles, respectively.

250 The IOP inversion algorithm for retrieving IOPs from  $R_{rs}$  require known spectral shape (eigenvector) of  
 251 each component in Eq. (8) to estimate the magnitude (eigenvalues) of each component (Table 2). The  
 252 spectral shape can be adjusted by changing the values of slope based on characteristics of the study area.  
 253 It is worth noting that a single averaged phytoplankton eigenvector does not provide species information  
 254 whereas a set of several species-specific phytoplankton eigenvectors allow estimates of species  
 255 composition. IOPs inversion algorithm applied in this study makes use of mass-specific phytoplankton  
 256 absorption spectra of 10 groups namely, dinoflagellate, diatom, chlorophyte, cryptophyte, haptophyte,  
 257 prochlorophyte, raphidophyte, rhodophyte, red cyanobacteria and blue cyanobacteria; these were obtained

258 from Dierssen et al. (2006) and Dutkiewicz et al. (2015) as eigen vectors rather than using one average  
 259  $a_{phy}(\lambda)$  spectrum. Subsequently, the inversion algorithm iterates repeatedly to minimize the difference  
 260 between modeled  $R_{rs}$  and in-situ measured  $R_{rs}$  ( $R_{rs\_insitu}$ ) until a best fit is achieved while allowing for  
 261 alterations of all parameters listed in Table 2 (Chase et al., 2017). The absolute percent errors between  
 262 modeled and measured values of  $R_{rs}$ ,  $a_{phy}$ ,  $a_{CDOM}$ ,  $a_{NAP}$  and  $b_{bp}$  were calculated as:

$$263 \quad \%error = \left| \frac{X_{modeled} - X_{measured}}{X_{measured}} \right| \times 100 \quad \dots\dots (9)$$

264 **Table 2.** Parameters and eigenvectors used in the semi-analytical inversion algorithm.

| Parameter                                                                                                                                                         | Equation                                                                                                                       | Slope      | Eigenvalue |
|-------------------------------------------------------------------------------------------------------------------------------------------------------------------|--------------------------------------------------------------------------------------------------------------------------------|------------|------------|
| $a_{CDOM}(\lambda)$                                                                                                                                               | $a_{CDOM}(\lambda) = M_{CDOM} \times \exp^{-S_{CDOM} \times (\lambda - \lambda_0)}$ ;<br>$\lambda_0 = 443$                     | $S_{CDOM}$ | $M_{CDOM}$ |
| $a_{NAP}(\lambda)$                                                                                                                                                | $a_{NAP}(\lambda) = M_{NAP} \times \exp^{-S_{NAP} \times (\lambda - \lambda_0)}$ ;<br>$\lambda_0 = 443$                        | $S_{NAP}$  | $M_{NAP}$  |
| $a_{phy}(\lambda)$                                                                                                                                                | $a_{phy}(\lambda) = \sum \text{Chl } a_i \times a_{phi}^*$ ;<br>$a_{phi}^*$ is the spectral shape of each phytoplankton group. |            | Chl $a_i$  |
| $b_{bp}(\lambda)$                                                                                                                                                 | $b_{bp}(\lambda) = B_{bp} \times (\lambda_0/\lambda)^{S_{bp}}$ ;<br>$\lambda_0 = 443$                                          | $S_{bp}$   | $B_{bp}$   |
| Note: $a_{phi}^*(\lambda)$ for 10 different groups of phytoplankton used in this study were extracted from (Dierssen et al., 2006) and Dutkiewicz et al., (2015). |                                                                                                                                |            |            |

## 265 2.8 Retrieving Pigments from Sentinel 3-OLCI $R_{rs}$

### 266 2.8.1 Reconstruction of Pigment Absorption Spectrum by Multiple Linear Regression

267 Total pigment absorption spectra  $a_{pig}(\lambda)$  obtained during both surveys (Eq. 5), were modeled as a third  
 268 order function of HPLC measured Chl a (Chl  $a_{HPLC}$ ) concentration at each station as (Moisan et al., 2017):

$$269 \quad a_{pig}(\lambda) = C_3 \times (\text{Chl } a_{HPLC})^3 + C_2 \times (\text{Chl } a_{HPLC})^2 + C_1 \times \text{Chl } a_{HPLC} + C_0 \quad \dots\dots (11)$$

270 where vector coefficient  $C=[C_3, C_2, C_1, C_0]$ , are wavelength-dependent coefficients that range from 400 to  
 271 700 nm at 1 nm interval; these were further applied to Sentinel-3A OLCI Chl a to calculate  $a_{pig\_OLCI}$  at  
 272 each pixel as:

$$273 \quad a_{pig\_OLCI}(\lambda) = C_3 \times (\text{Chl } a_{OLCI})^3 + C_2 \times (\text{Chl } a_{OLCI})^2 + C_1 \times \text{Chl } a_{OLCI} + C_0 \quad \dots\dots (12)$$

274 where Chl  $a_{OLCI}$  is Sentinel-3A OLCI derived Chl a concentration (259×224 pixels); the obtained image  
 275 represents the value of  $a_{pig\_OLCI}$  at a certain wavelength and 301 images of  $a_{pig\_OLCI}$  can be obtained in  
 276 the 400-700 nm wavelength range at 1 nm interval.

### 277 2.8.2 Satellite Retrieval of Pigments using Non-Negative Least Square (NNLS) Inversion Model

278 The  $a_{pig\_OLCI}$  is a mixture of n pigments with known absorption spectra  $a_i(\lambda)$ ,  $i = 1, 2, \dots, n$  at wavelength  
 279  $\lambda$  (nm); thus,  $a_{pig\_OLCI}(\lambda)$  can be considered as a weighted sum of individual component spectrum  
 280 (Thrane et al., 2015) at each image point as:



281  
 282 
$$a_{\text{pig\_OLCI}}(\lambda) = x_1 \times a_1(\lambda) + x_2 \times a_2(\lambda) + \dots x_n \times a_n(\lambda) \quad \dots (13)$$

283  
 284 where  $A(\lambda) = [a_1(\lambda), a_2(\lambda), \dots a_n(\lambda)]$  represent the mass-specific spectra of 16 pigments (Chl a, Chl b,  
 285 Chl c<sub>1</sub>, Chl c<sub>2</sub>, pheophytin-a, pheophytin-b, peridinin, fucoxanthin, neoxanthin, lutein, violaxanthin,  
 286 alloxanthin, diadinoxanthin, diatoxanthin, zeaxanthin, and  $\beta$ -carotenoid), which are the in-vitro pigment  
 287 absorption spectra over pigment concentrations and can be extracted from supplementary R scripts of  
 288 Thrane et al. (2015). The vector coefficient  $X = [x_1, x_2, \dots x_n]$  correspond to the concentrations ( $\mu\text{g L}^{-1}$ ) of  
 289 these distinct pigments; note that  $X$  cannot be negative, therefore, non-negative least squares (NNLS) was  
 290 used to guarantee positive solutions of  $X$  (Moisan et al., 2013; Thrane et al., 2015). Eq. 13 can be further  
 291 expressed as:  
 292

293 
$$\begin{bmatrix} a_{\text{pig}}(400)_{\text{OLCI}} \\ a_{\text{pig}}(401)_{\text{OLCI}} \\ \vdots \\ a_{\text{pig}}(700)_{\text{OLCI}} \end{bmatrix} = \begin{bmatrix} x_1 \\ x_2 \\ \vdots \\ x_n \end{bmatrix} \times \begin{bmatrix} a_1(400), a_2(400), \dots a_n(400) \\ a_1(401), a_2(401), \dots a_n(401) \\ \vdots \\ a_1(700), a_2(700), \dots a_n(700) \end{bmatrix} \quad \dots (14)$$

294 **2.9 Processing Approach**

295 Sentinel 3A-OLCI pigment maps were generated using the processing pathway 1 (Fig. 2) that includes the  
 296 following: 1) developing empirical relationships between HPLC-measured Chl a and  $R_{rs\_in\text{-}situ}$  band ratio  
 297 for Sentinel 3A-OLCI band 9 (673 nm) and band 11 (709 nm) to generate Sentinel 3A-OLCI Chl a maps,  
 298 2) converting Chl a concentration to  $a_{\text{pig\_OLCI}}(\lambda)$  maps, and subsequently decomposing  $a_{\text{pig\_OLCI}}(\lambda)$  into  
 299 individual pigment spectra to generate phytoplankton pigment maps for GB. In processing pathway 2,  
 300 phytoplankton taxonomic composition at each sampling station was obtained from a 10-species IOP  
 301 inversion model, which take  $R_{rs\_in\text{-}situ}$  as input and estimates Chl a concentration of each phytoplankton  
 302 group (Fig. 2). Finally, CDOM-corrected F<sub>v</sub>/F<sub>m</sub> and  $\sigma_{\text{PSII}}$  were combined with  
 303 phytoplankton taxonomy to assess photosynthetic physiology of different phytoplankton groups.

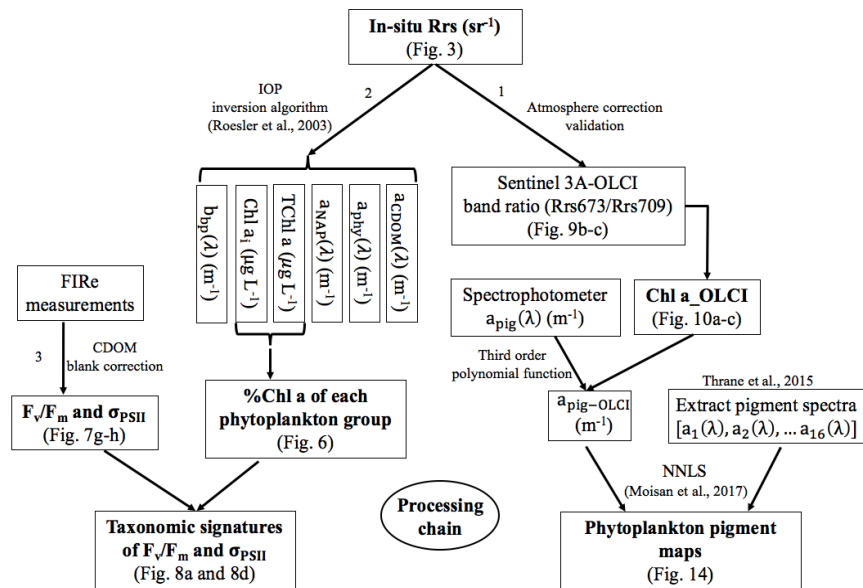

304  
 305 Figure 2. Flowchart showing the three processing steps for: (1) retrieving pigments spatial distribution  
 306 maps from OLCI, (2) distinguishing phytoplankton groups, and (3) assessing phytoplankton physiological

307 parameters and their linkages to taxonomic groups.

### 308 3. Results

#### 309 3.1 Phytoplankton Taxonomy and Physiological State from Field Observations

##### 310 3.1.1 Measurements of Above Water Remote Sensing Reflectance

311 Above-water remote sensing reflectances ( $R_{rs\_insitu}$ ) from the two surveys (Fig. 3) reflect the influence of  
312 the absorbing and scattering features of water constituents. Low reflectance ( $\sim 675$  nm) caused by Chl a  
313 red light absorption and maximum reflectance at green wavelength ( $\sim 550$  nm) were observed. Obvious  
314 dips at  $\sim 625$  nm versus reflectance peaks  $\sim 650$  nm were observed in spectra during both surveys, which  
315 could be attributed to cyanobacteria modulation of the spectra (Hu et al., 2010). The reflectance peak  
316 around 690–700 nm was obvious at most sampling sites except at stations 13 and 14 adjacent to the  
317 nGOM and were likely due to the effect of Chl a fluorescence (Gitelson, 1992; Gilerson et al., 2010). The  
318 peak position at stations with lower Chl a concentration ( $\sim 5 \mu\text{g L}^{-1}$ ) were observed at 690–693 nm;  
319 however, the peaks shifted to longer wavelengths of 705 and 710 nm for station 23 and 19 with extremely  
320 high Chl a concentrations of  $\sim 31$  and  $50 \mu\text{g L}^{-1}$ , respectively (Fig. 3).

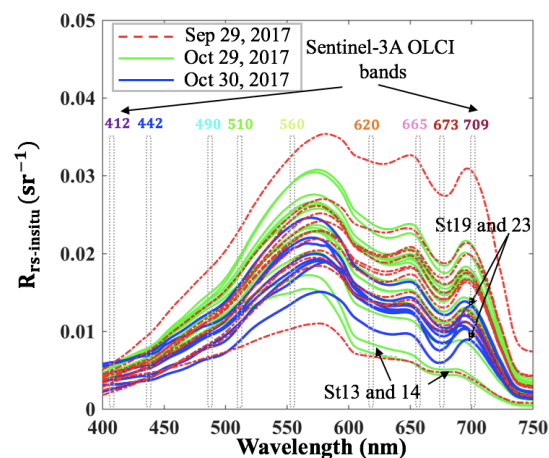

321  
322 **Figure 3.**  $R_{rs\_insitu}$  spectra at stations in GB on September 29, and October 29-30, 2017; vertical bars  
323 represent Sentinel-3A OLCI spectral bands.

##### 324 3.1.2 Performance of IOP Inversion Algorithm

325 The IOP inversion algorithm was applied to  $R_{rs\_insitu}$  data (Fig. 3) obtained during the two surveys in GB.  
326 The mean errors for modeled  $a_{CDOM}$ ,  $a_{NAP}$ ,  $a_{phy}$  and  $b_{bp\_470}$  at all wavelengths for the 34 stations were  
327 5.86%, 6.83%, 12.19% and 10.79%, respectively (Table 3). A total of 8 phytoplankton groups  
328 (dinoflagellate, diatom, chlorophyte, cryptophyte, haptophyte, prochlorophyte, raphidophyte, and blue  
329 cyanobacteria) were spectrally detected from IOP inversion algorithm. The sum of 8 eigenvalues of  $Chl_i$   
330 (Table 2) represents the modeled total Chl a ( $TChl a_{mod}$ ) of the whole phytoplankton community. The  
331  $TChl a_{mod}$  is better correlated with HPLC-measured total Chl a ( $TChl a_{HPLC}$ ) for survey 2 (green circle;  
332 Fig. 4a) with  $R^2 \sim 0.92$ , compared to survey 1 (red color; Fig. 4a). In addition, the  $TChl a_{mod}$  appear to be  
333 slightly higher than  $TChl a_{HPLC}$  for survey 2. The modeled  $a_{CDOM}$  ( $a_{CDOM\_mod}$ ) are in close agreement with  
334 spectrophotometrically measured  $a_{CDOM}$  at 412 nm (Fig. 4b), with  $a_{CDOM}$  obtained on September 29, 2017  
335 much higher than that on October 29-30, 2017. The modeled  $b_{bp}$  ( $b_{bp\_mod}$ ) are well correlated with in-situ  
336  $b_{bp}$  ( $b_{bp\_insitu}$ ) at 470 nm (Fig. 4c) with higher  $R^2$  (0.81) observed on September 29, 2017. In addition, both

337 modeled and field-measured  $b_{bp}$  showed stronger backscattering at most stations on September 29, 2017  
 338 than those on October 29-30, 2017.

339  
 340 **Table 3.** Error statistics over all wavelengths and sampling stations ( $N=301 \times 34=10234$ ; 12 and 22  
 341 stations on Sep 29 and Oct 29-30, 2017) from semi-analytical IOP inversion algorithm.  
 342

| Parameter                                   | Min. error (%) | Max. error (%) | Mean error (%) | R <sup>2</sup> (Sep) | R <sup>2</sup> (Oct) |
|---------------------------------------------|----------------|----------------|----------------|----------------------|----------------------|
| $R_{rs} \lambda \in [400,700]$              | 0.005          | 40.12          | 18.71          | 0.90                 | 0.89                 |
| $a_{CDOM}(\lambda), \lambda \in [400,700]$  | 0.042          | 11.20          | 5.86           | 0.92                 | 0.94                 |
| $a_{NAP}(\lambda), \lambda \in [400,700]$   | 0.001          | 11.46          | 6.73           | 0.90                 | 0.91                 |
| $a_{PHY}(\lambda), \lambda \in [400,700]$   | 0.001          | 36.42          | 12.19          | 0.84                 | 0.85                 |
| $b_{bp}(\lambda), \lambda = 470 \text{ nm}$ | 0.057          | 40.22          | 10.79          | 0.81                 | 0.43                 |

343  
 344 The Chl a percentage (%Chl a), which is  $Chl_i/TChl a$ , were also compared with diagnostic pigment  
 345 percentage (%DP), which is specific DP for each phytoplankton group over the sum of DP ( $\sum DP$ ). The  
 346 DP for diatom (fucoxanthin), dinoflagellate (peridinin), cryptophytes (alloxanthin), chlorophyte (Chl b),  
 347 haptophyte (19'-hexanoyloxyfucoxanthin), and cyanobacteria (zeaxanthin) referred in (Moisan et al.,  
 348 2017) were used in this study. The R<sup>2</sup> between %Chl a and %DP for different phytoplankton groups range  
 349 from 0.15 to 0.81 (Fig. 4). The %Chl a of cryptophyte is between 5%-42% and well correlated with  
 350 alloxanthin/ $\sum DP$  ( $R^2 \sim 0.62-0.72$ ; Fig. 4d) for both surveys. In addition, the cryptophyte %Chl a at station  
 351 19 and 23 on October 30, 2017 was highest ( $\sim 40\%$ ) in coincidence with the highest value of alloxanthin/  
 352  $\sum DP$  (Fig. 4d). Furthermore, relationship between chlorophyte %Chl a and Chl b/ $\sum DP$  ( $R^2 \sim 0.55$ ; Fig. 4e)  
 353 showed that chlorophyte during survey 1 contributed higher fraction to the whole phytoplankton  
 354 community compared to survey 2. The %Chl a of cyanobacteria highly correlated with zeaxanthin/ $\sum DP$   
 355 with R<sup>2</sup> larger than 0.7 (Fig. 4f) for both surveys. Low %Chl a of dinoflagellate in coincidence with low  
 356 peridinin/ $\sum DP$  ( $R^2 \sim 0.78$ ) were observed at stations along the transect, however, increased contribution  
 357 of dinoflagellate appeared adjacent to the entrance during both surveys (Fig. 4g).

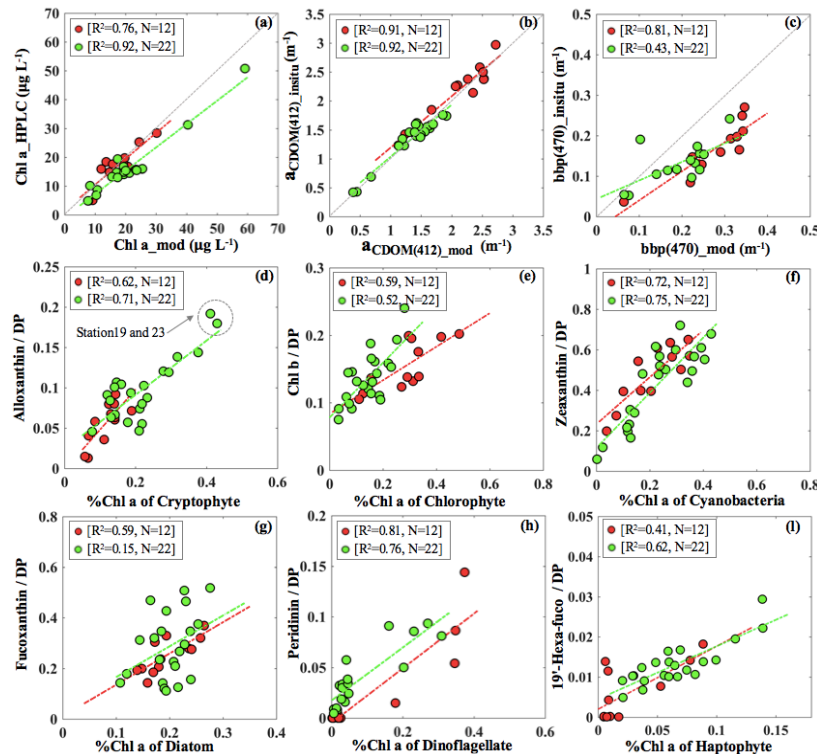

359 **Figure 4.** (a) Validation of TChl  $a_{mod}$  via HPLC-measured TChl  $a$ ; individual %Chl  $a$  of each detected  
 360 taxa versus corresponding %DP shown with (d) cryptophyte, (e) chlorophyte, (f) cyanobacteria, (g)  
 361 diatom, (h) dinoflagellate, and (l) haptophyte; red and green dots indicate the samples on September 29  
 362 and October 29-30, 2017, respectively. Comparison between in-situ measurements and modeled results  
 363 with (b)  $a_{CDOM}(412)$  and (c)  $b_{bp}(470)$ .

### 364 3.1.3 Variations in Phytoplankton Community Structure

365 Reconstruction of the phytoplankton absorption coefficients spectra revealed variations in phytoplankton  
 366 community structure (Fig. 5) even several weeks after Hurricane Harvey. The modeled  $a_{phy}$  spectra  
 367 ( $a_{phy\_mod}$ ) at stations 6, 13, 17 and 19 (Fig. 5a-f) yielded spatiotemporal differences of phytoplankton  
 368 taxonomic composition in GB. The strong absorption peak around 625 nm induced by cyanobacteria was  
 369 observed at most of the stations for both modeled results and in-situ measurements (Fig. 5a, 5c and 5e)  
 370 except at stations adjacent to the entrance (Fig. 5b and d). The  $a_{phy\_mod}$  at station 6 was primarily  
 371 dominated by group of cyanobacteria (blue line) and chlorophyte (green line) on September 29, 2017 (Fig.  
 372 5a); in contrast, the spectrum of chlorophyte contributed very little at station 6 on October 29, 2017  
 373 (green line; Fig. 5c). Furthermore, the shape of spectra for samples obtained at station 13 showed strong  
 374 dinoflagellate-modulation versus extremely low cyanobacteria contribution during survey 1 (red line; Fig.  
 375 5b). However, small-size group like haptophyte and prochlorophyte displayed increasing proportions at  
 376 station 13 on October 29, 2017 (Fig. 5d). Station 17 in the East Bay was dominated by cyanobacteria  
 377 (blue line; Fig. 5e) and cryptophyte (pink line; Fig. 5e) absorption spectra, whereas, on October 30, 2017,  
 378 the main spectral features at station 19 in the upper GB was from cryptophyte (pink line) and chlorophyte  
 379 (green line; Fig. 5f).

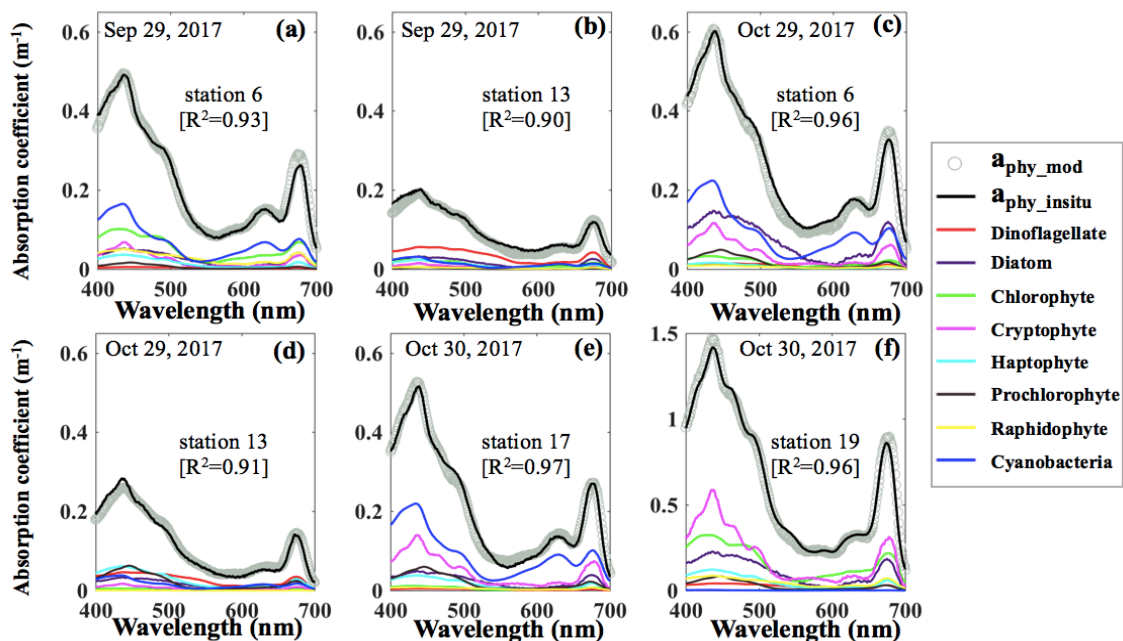

380 **Figure 5.** Reconstruction of phytoplankton absorption coefficients spectra at station 6 (a) and 13 (b) on  
 381 September 29, 2017, at station 6 (c) and 13 (d) on October 29, 2017 and at 17(e), and 19 (f) on October  
 382 30, 2017 based on the mass specific absorption spectra of different phytoplankton groups including  
 383 diatom, chlorophyte, dinoflagellate, cryptophyte, cyanobacteria (blue), haptophyte, prochlorophyte and  
 384 raphidophyte presented using different colors.  
 385  
 386

387 The corresponding taxa-specific %Chl  $a$  derived from IOPs inversion algorithm for the two surveys on  
 388 September 29 and October 29-30, 2017 are shown in Figure 6a and 6b, respectively. Cyanobacteria (blue

389 bars) and chlorophyte (green bars) constituted over 55% of the phytoplankton communities during survey  
 390 1 (September 29, 2017; Fig. 6a). In addition, chlorophyte, known to proliferate in freshwater  
 391 environments, showed higher fraction than that observed in survey 2 (green color; Fig. 6). Further,  
 392 chlorophyte together with diatoms (purple color; Fig. 6a) accounted for ~ 60% of TChl a<sub>mod</sub> at many  
 393 stations (e.g., station 7, 8 and 9) with a well-mixed water column (inferred from salinity profiles; not  
 394 shown) on September 29, 2017. Cryptophyte, haptophyte and raphidophyte became a minor component  
 395 of the community and accounted in total to ~25% of TChl a<sub>mod</sub> (Fig. 6a). Furthermore, contribution by  
 396 dinoflagellate group to TChl a<sub>mod</sub> was low inside the bay, but showed increasing %Chl a (~30%) in  
 397 higher salinity waters adjacent to the nGOM (red color; Fig. 6a). Cyanobacteria (blue color; Fig. 7)  
 398 exhibited a slightly elevated percentage during survey 2 (~60 days after hurricane passage, October 29-30,  
 399 2017) and were quite abundant at station 16, 17 and 18 in East Bay where the water was calm and  
 400 stratified as observed from salinity profiles. In addition, cyanobacteria were not prevailing adjacent to the  
 401 nGOM (Station 12, 13 and 14) and close to San Jacinto (station 19, 20, 21, 23 and 24), where cryptophyte  
 402 (pink color) and chlorophyte (green color) showed dominance (Fig. 6b). The %Chl a of chlorophyte  
 403 obtained at stations along the Trinity River transect decreased by ~10% on October 29-30, 2017  
 404 compared to that on September 29, 2017. Small size groups like haptophyte and prochlorophyte increased  
 405 on October 29-30, 2017 and were more abundant adjacent to the nGOM, accounting for more than 25%  
 406 of the TChl a<sub>mod</sub>.

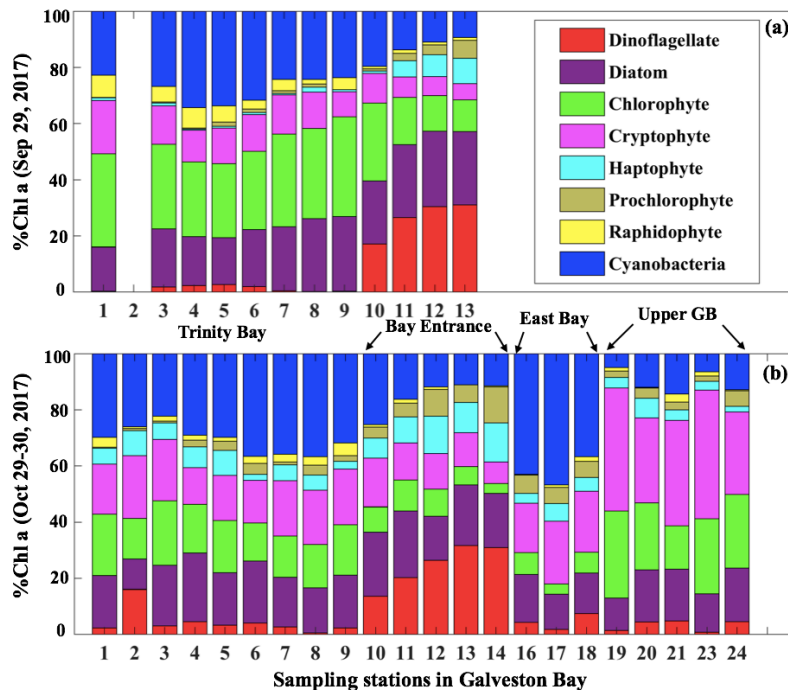

407  
 408 **Figure 6.** Phytoplankton taxonomic compositions detected from IOP inversion algorithm on September  
 409 29 and October 29-30, 2017 in Galveston Bay; phytoplankton groups are represented in different colors as  
 410 shown in the legend.

### 411 3.1.4 Environmental Conditions and Physiological State of Phytoplankton Community

412 The surface salinity presented a pronounced seaward increasing gradient along the transect (station 3-14)  
 413 during both the surveys (Fig. 7a) with primarily lower salinity throughout the bay during survey 1 in  
 414 comparison to survey 2, which indicated the freshening impact was still ongoing even 4 weeks after  
 415 Hurricane Harvey. The salinity was ~15 at station 16 and decreasing when going further into East Bay  
 416 (~10 at station 17 and 18; Fig. 7a). In upper GB, salinity at station 19-24 did not vary significantly (~15),  
 417 increasing along with the distance away from the San Jacinto River mouth with highest value (~17.5) at

418 station 24. During both surveys, lowest Chl a (Fig. 7b) were observed adjacent to the nGOM, and the  
 419 highest Chl a were closest to the river mouth. The photosynthetically Active Radiation (PAR) which were  
 420 calculated from down-welling irradiance (not shown here) decreased significantly with depth, but surface  
 421 PAR (Fig. 7c) were similar in magnitude at all stations. Pigment ratios including TChl a/TP (0.58-0.68),  
 422 PSC/Chl a (0.07-0.26) and AP/TP (0.34-0.42) were obtained from HPLC measurements and shown in  
 423 Figure 7d, 7e and 7f, respectively.

424 The CDOM calibrated and 0-0.5m depth averaged photosynthetic parameters  $F_v/F_m$  varied from 0.41 to  
 425 0.64 (Fig. 7g), while  $\sigma_{PSII}$  was in the range of 329-668  $\text{\AA}^2\text{quantum}^{-1}$ (Fig. 7h). The highest  $\sigma_{PSII}$  and  
 426 lowest  $F_v/F_m$  appeared adjacent to the nGOM (station 12-14). Conversely, values of  $F_v/F_m$  at stations 7-9  
 427 with a well-mixed water column were high with low values of  $\sigma_{PSII}$ . Both  $F_v/F_m$  and  $\sigma_{PSII}$  did not  
 428 directly correlate with Chl a, (e.g., high Chl a  $\sim 51 \mu\text{g L}^{-1}$  at station 19 corresponded to a relatively low  
 429 level of  $F_v/F_m \sim 0.45$ , versus high  $\sigma_{PSII} \sim 550 \text{\AA}^2\text{quantum}^{-1}$ ). However, the stations with high  $F_v/F_m$   
 430 coincided with the high fraction of Chl a (Chl a/TP) and low fraction of AP (AP/TP) (Fig. 7d and 7f). In  
 431 contrast,  $\sigma_{PSII}$  showed an overall positive relationship with AP/TP, but altered negatively with Chl a/TP  
 432 during both surveys. The lowest (highest) value of  $\sigma_{PSII}$  ( $F_v/F_m$ ) were observed at station 9 corresponding  
 433 to the highest Chl a/TP value ( $\sim 0.64$ ) on October 29, 2017. The highest AP/TP and PSC/Chl a were  
 434 obtained from stations adjacent to the nGOM.

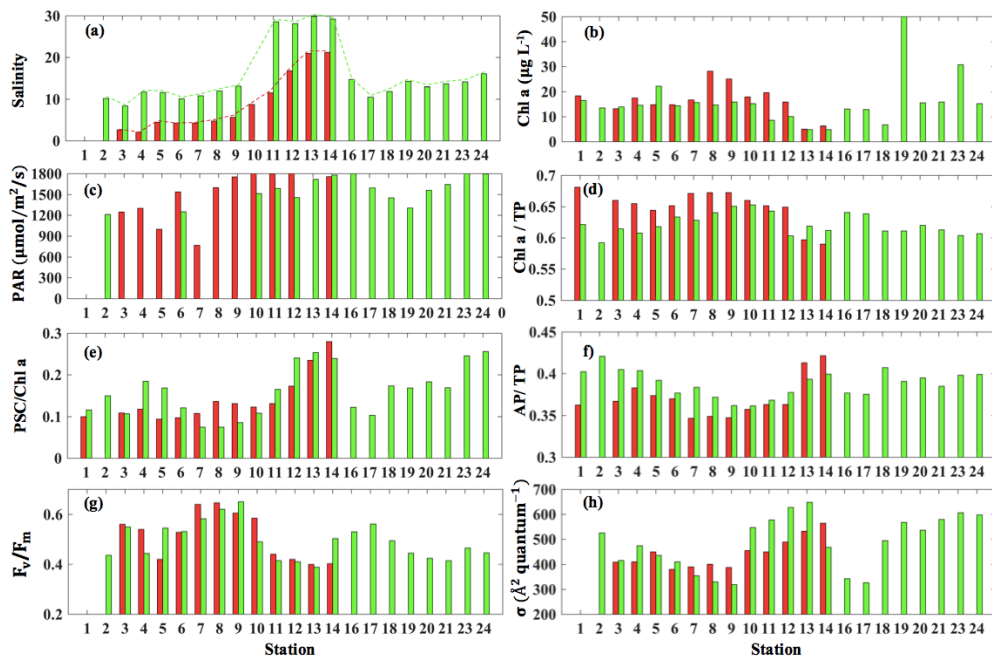

435  
 436 **Figure 7.** Environmental conditions (salinity, light field), pigment composition and physiological state in  
 437 GB surface waters (red bars indicating samples from September 29, 2017 and blue bars representing  
 438 samples from October 29 and 30, 2017). (a) Salinity, (b) Chl-a concentration, (c) PAR, (d) Chl a/TP, (e)  
 439 PSC/Chl a, (f) AP/TP, (g)  $F_v/F_m$ , and (h)  $\sigma_{PSII}$ .

### 440 3.1.5 $F_v/F_m$ and $\sigma_{PSII}$ Taxonomic Signatures

441 Distinct pigments housed within phytoplankton light-harvesting antennae can strongly influence PSII  
 442 light-harvesting capability and the photosynthetic quantum efficiency of phytoplankton (Lutz et al., 2001).  
 443 In this study, we observed an inverse relationship ( $R^2 \sim 0.63-0.81$ ; Fig. 8a and d) between the  $F_v/F_m$  and

444  $\sigma_{\text{PSII}}$ , that appeared related to taxonomic signals during surveys 1 and 2 in GB. Stations 1-9 along the  
 445 transect were considered as well-mixed group with no dominance by any particular group (black circles;  
 446 Fig. 8a-c); stations 10-14 close to the entrance were however, strongly dominated by dinoflagellate and  
 447 haptophyte (red symbol; Fig. 8a-c) during survey 1. This well-mixed group displayed low values of  $\sigma_{\text{PSII}}$   
 448 ( $\sim 390\text{-}439 \text{ \AA}^2\text{quantum}^{-1}$ ), and high levels of  $F_v/F_m$  ( $\sim 0.42\text{-}0.65$ ) with  $F_v/F_m$  approaching 0.65 at station  
 449 9 on September 29, 2017 (Fig. 8a). However, enhanced contributions of dinoflagellate and haptophyte  
 450 around the entrance corresponded to a decline of  $F_v/F_m$  ( $0.3\text{-}0.4$ ) against an increase of  $\sigma_{\text{PSII}}$  ( $500\text{-}600$   
 451  $\text{ \AA}^2\text{quantum}^{-1}$ ) during survey 1. Furthermore, samples obtained from survey 2 at station 1-9, station 10-  
 452 14, station 16-18 and station 19-24 were considered as well-mixed (black), dinoflagellate-haptophyte  
 453 dominated (red), cyanobacteria dominated (blue) and cryptophyte-chlorophyte dominated (green),  
 454 respectively. Stations 16-17 dominated by cyanobacteria (blue triangles; Fig. 8d) showed high level of  
 455  $F_v/F_m$  ( $0.5\text{-}0.6$ ) and relatively low values of  $\sigma_{\text{PSII}}$  ( $300\text{-}400 \text{ \AA}^2\text{quantum}^{-1}$ ). The  $F_v/F_m$  and  $\sigma_{\text{PSII}}$  of  
 456 cryptophyte-chlorophyte dominated stations showed a moderate level of  $F_v/F_m$  ( $0.4\text{-}0.5$ ) and  $\sigma_{\text{PSII}}$   
 457 ( $580\text{-}680 \text{ \AA}^2\text{quantum}^{-1}$ ). More importantly, tight positive relationships existed between measurements  
 458 of  $F_v/F_m$  and Chl a/TP ( $R^2\sim 0.31\text{-}0.63$ ; Fig. 8b and e). On the other hand,  $\sigma_{\text{PSII}}$  were positively correlated  
 459 with PSC/Chl a with  $R^2\sim 0.6$  (Fig. 8c and f). The PSC/Chl a of cyanobacteria dominated group (blue  
 460 symbols), and well mixed group (brown symbols) were relatively low. Highest PSC/Chl a and lowest Chl  
 461 a/TP was observed for the dinoflagellate-haptophyte dominated group, corresponding to the lowest  $\sigma_{\text{PSII}}$   
 462 and highest  $F_v/F_m$ . In addition, cryptophyte-chlorophyte dominated group had high levels of PSC/TChl a  
 463 ( $\sim 0.18\text{-}0.26$ ) and slightly higher Chl a/TP compared to dinoflagellate-haptophyte dominated group.  
 464 Overall, well-mixed groups with high proportion of large-size phytoplankton (e.g., diatoms and  
 465 chlorophyte) showed higher Chl a/TP along with larger  $F_v/F_m$  and smaller  $\sigma_{\text{PSII}}$  than those stations with  
 466 high fraction of dinoflagellate and pico-populations (Fig. 8c and f).

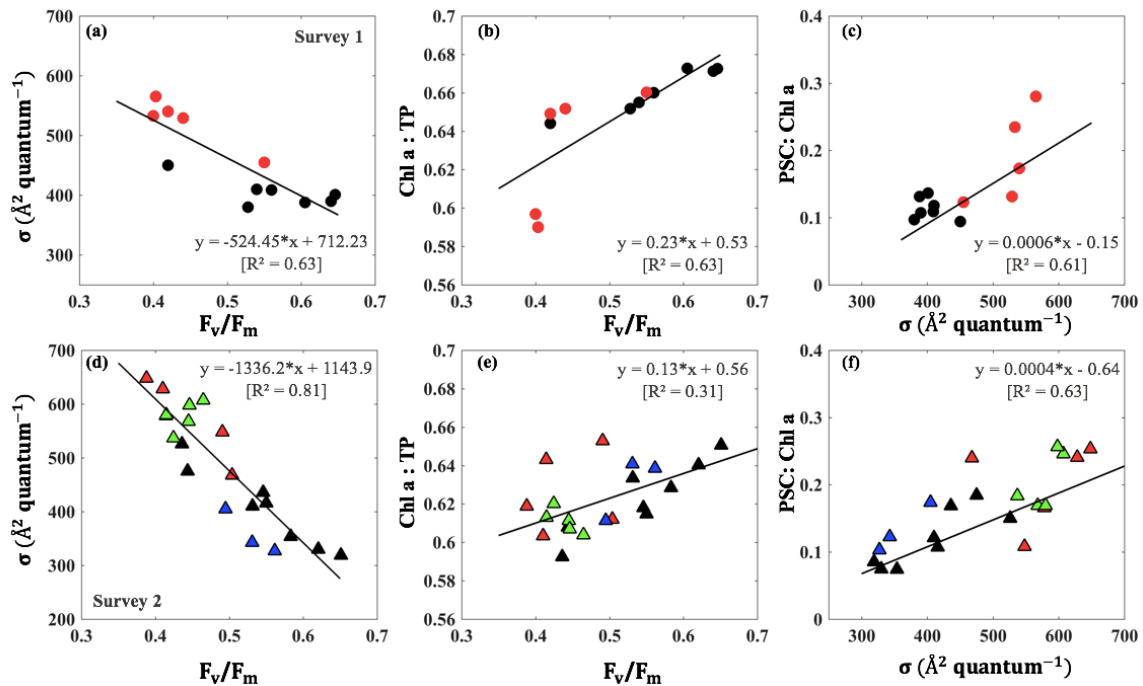

467  
 468 **Figure 8.** a, d)  $\sigma_{\text{PSII}}$  against  $F_v/F_m$ ; b, e)  $F_v/F_m$  versus Chl a/TP; and c, f)  $\sigma_{\text{PSII}}$  versus PSC/Chl a on  
 469 September 29 and October 29-30, 2017 respectively. The data points identified by dominant taxa with  
 470 black, red, green and blue symbols denoting well-mixed, dinoflagellate-haptophyte dominated,  
 471 cryptophyte-chlorophyte dominated, and cyanobacteria dominated groups, respectively.

### 472 3.2 Satellite Observations of Phytoplankton Pigments

473 **3.2.1 An OLCI Chl a Algorithm and its Validation**

474 Blue to green band ratio algorithms have been widely used to study Chl a in the open ocean and shelf  
 475 waters (D'Sa et al., 2006; Blondeau-Patissier et al., 2014); however, these bands generally fail in  
 476 estuarine waters due to strong blue absorption by the high levels of CDOM and suspended particulate  
 477 matter, especially after flooding events associated with hurricanes (D'Sa et al., 2011; D'Sa et al., 2018;  
 478 Joshi and D'Sa, 2018). The percentage contribution by CDOM fluorescence (blank) to maximum  
 479 fluorescence yield ( $F_m$ ) obtained from in-situ FIRE (Fig. 9a) demonstrated that Chl a fluorescence was  
 480 strongly influenced by high amounts of CDOM fluorescence in GB, especially during the first survey  
 481 (September 29, 2017), when the bay was under strong floodwater influence (red triangles; Fig. 9a). The  
 482 CDOM fluorescence signal constituted  $\sim 25\%$  in the region adjacent to the nGOM (stations 12-14),  
 483 between 25%-50% in the upper GB, and up to  $\sim 65\%$  in Trinity Bay, which implied that blue and even  
 484 green band are highly contaminated by CDOM and might not be the most suitable bands for estimating  
 485 Chl a in GB. However, an increase in peak height near 700 nm and its shift towards longer wavelength  
 486 (Fig. 3) can be used as a proxy to estimate Chl a concentration (Gitelson, 1992).

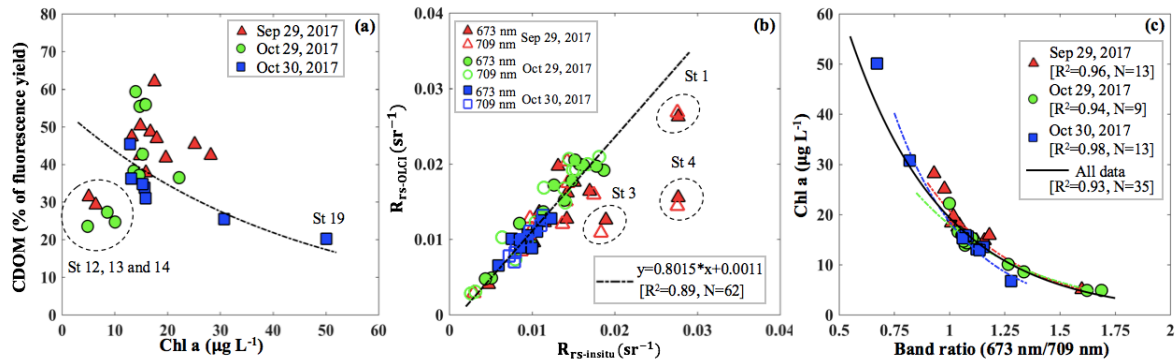

487  
 488 **Figure 9. (a)** Relationship between the percentage of the fluorescence yield of CDOM measured by FIRE  
 489 against HPLC measured Chl a concentration. **(b)** Comparisons between  $R_{rs\_insitu}$  and  $R_{rs\_OLCI}$  at band 9 (673  
 490 nm) and band 11 (709 nm). **(c)** Exponential relationships between HPLC-measured Chl a concentrations  
 491 and  $R_{rs\_insitu}$  band ratio (673 nm/709 nm) in GB on September 29 ( $R^2=0.89$ ), October 29 ( $R^2=0.93$ ) and  
 492 October 30 ( $R^2=0.97$ ). Red, green and blue lines and symbols indicate data sets obtained on September 29,  
 493 October 29 and 30, 2017 respectively.

494 The C2RCC atmospheric-corrected  $R_{rs\_OLCI}$  at each of the sampling sites were further averaged ( $3 \times 3$   
 495 pixels) and compared with  $R_{rs\_insitu}$  (Fig. 3) at phytoplankton red absorption ( $\sim 673$  nm) and Chl a  
 496 fluorescence ( $\sim 700$  nm) bands (Fig. 9b). The C2RCC performed overall better for the second survey on  
 497 October 29-30, 2017 (green and blue symbols; Fig. 9b) than the first survey on September 29, 2017 (red  
 498 triangles; Fig. 9b) when stations 1, 3 and 4 (circled triangles; Fig. 3c) adjacent to the Trinity River mouth  
 499 were included; these stations were the last sampling sites in the afternoon ( $\sim 4:30$  pm) and under  
 500 somewhat cloudy conditions. The time difference between satellite pass and in-situ measurements, sky  
 501 conditions and shallow water depth also likely introduced more errors at these locations. The  $R^2$  between  
 502  $R_{rs\_OLCI}$  and  $R_{rs\_insitu}$  at red and near infrared (NIR) bands was 0.89 when the data from station 3 and 4 were  
 503 excluded, suggesting good usability of these two bands for Chl a empirical algorithms in GB. Thus, the  
 504 higher the Chl a concentration, the stronger the red light absorption, resulting in higher reflectance at 709  
 505 nm; consequently, negative correlations were observed between Red/NIR band ratio and Chl a. The ratio  
 506 of Red ( $\sim 673$  nm) and NIR (709 nm) reflectance bands from in-situ measurements were overall highly  
 507 correlated with HPLC-measured Chl a with  $R^2 \sim 0.96, 0.94$  and  $0.98$  on September 29, October 29 and



508 October 30, 2017, respectively (Fig. 9c). The Sentinel-3A OLCI Chl a maps (Fig. 10a-c) were generated  
 509 for all data based on the relationship between Chl a and the Red and NIR band ratio as:

510 
$$\text{Chl a } (\mu\text{g L}^{-1}) = 216.38 \times \exp\left(-2.399 \times \frac{R_{rs}(673)}{R_{rs}(709)}\right) \quad [\text{All data}] \quad \dots\dots (15)$$

511 The OLCI-derived Chl a (Fig. 10a-c) showed a good spatial agreement with Chl a<sub>HPLC</sub> (Fig. 10d-f). In  
 512 addition, a comparison of this algorithm with that of Gilerson et al., 2010 revealed slightly better  
 513 performance (not shown) inside of GB and especially in the area adjacent to the shelf.

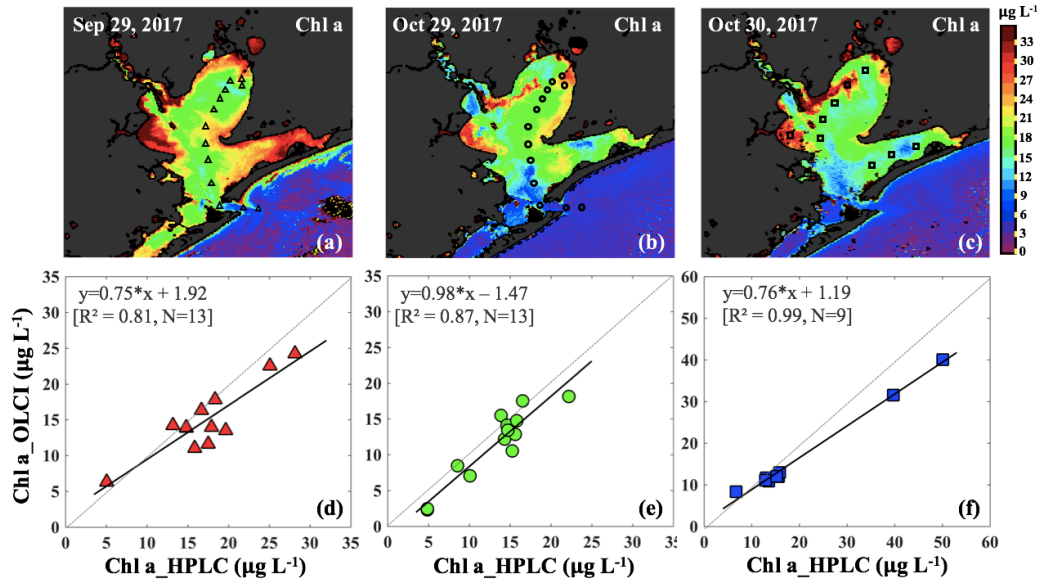

514  
 515 **Figure 10.** Chl a concentration generated based on in-situ band ratio ( $R_{rs673}/R_{rs709}$ ) algorithm with (a),  
 516 (b) and (c) representing Chl a distribution on September 29, October 29 and October 30, 2017,  
 517 respectively; (c), (d) and (f) show the validation between HPLC-measured Chl a and OLCI-derived Chl a  
 518 on September 29, October 29 and October 30, 2017, respectively.

519 The Chl a concentration on September 29, 2017 was overall higher than that on October 29-30, 2017  
 520 through the entire bay. East Bay displayed very high Chl a concentration, with highest value ( $>30 \mu\text{g L}^{-1}$ )  
 521 observed on September 29, 2017 (Fig. 10a). The narrow shape and shallow topography of East Bay  
 522 results in relatively higher water residence time (Rayson et al. 2016); thus, the reduced exchange with  
 523 shelf waters likely lends the East Bay vulnerable to eutrophication. The average Chl a concentration on  
 524 October 29-30, 2017 were  $\sim 15 \mu\text{g L}^{-1}$  along the transect (station 1-11) and  $\sim 4\text{-}6 \mu\text{g/L}$  (station 12-14)  
 525 close the entrance of GB. In addition, Chl a adjacent to San Jacinto River mouth ( $>16 \mu\text{g L}^{-1}$ ) was higher  
 526 than that in Trinity Bay, which might suggest that San Jacinto inflow had higher nutrient concentrations  
 527 than Trinity as also previously reported (Quigg et al., 2010). Furthermore, the OLCI-Chl a maps on  
 528 October 29 and 30, 2017 showed extremely high Chl a concentration in a narrow area adjacent to the San  
 529 Jacinto River mouth, with Chl a approaching  $\sim 40 \mu\text{g L}^{-1}$  at station 19 (Fig. 10c).

530 **3.2.2 Long-term Chl a Observations in Comparison with Hurricane Harvey Event**

531 OLCI-derived Chl a maps between August, 2016-November, 2017 (Fig. 11a<sub>1</sub>-a<sub>15</sub>) and time series of  
 532 averaged Chl a values in the areas of Trinity Bay, East Bay and adjacent to the nGOM (Fig 11b) revealed  
 533 regionally different responses of Chl a to freshwater discharge from the San Jacinto and the Trinity Rivers  
 534 (Fig. 11b). Due to the relatively much higher discharge from the Trinity River, the spatial distribution of  
 535 Chl a in the bay (Fig. 11) generally indicates its greater influence than the San Jacinto River. During the

536 winter, and spring in 2017, phytoplankton Chl a peaks  $\sim 32 \mu\text{g L}^{-1}$  in Trinity Bay (Fig. 11b) were observed  
 537 after high inflows from both rivers (Fig. 11a<sub>5</sub>-a<sub>8</sub>). Chla then slightly decreased to  $\sim 20 \mu\text{g L}^{-1}$  in summer  
 538 (July and August, 2017). Generally, Chl a showed overall lower value ( $\sim 10 \mu\text{g L}^{-1}$ ) between September-  
 539 December, 2016 compared to 2017 in the absence of meteorological and hydrological events (Fig. 11a<sub>1</sub>-  
 540 a<sub>4</sub>). However, with the East Bay less directly affected by river discharge, Chl a levels remained fairly  
 541 constant in the range of  $\sim 18$ - $24 \mu\text{g L}^{-1}$  before hurricane. In contrast, extremely high river discharge ( $\sim 3300$   
 542  $\text{m}^3\text{s}^{-1}$ ) induced by Hurricane Harvey in late August, 2017, elevated Chla in both Trinity and East Bay to  
 543 higher levels as observed on September 14, 2017 ( $\sim 30$ - $35 \mu\text{g L}^{-1}$ ; Fig. 11a<sub>11</sub>) compared to mean state of  
 544 fall season in 2016. Chl a then continuously decreased through September to October, 2017 in Trinity and  
 545 East Bay and were relatively low ( $\leq 10 \mu\text{g L}^{-1}$ ) in November, 2017 under no additional pulses of river  
 546 discharge. Concentration of Chla adjacent to the entrance of GB exhibiting much lower values year round  
 547 than that of the Trinity and East Bay, and also showed slight positive responses to the enhanced river  
 548 discharge and the hurricane-induced flooding events. In addition, Chl a concentrations always displayed  
 549 low values along the Houston Ship Channel.

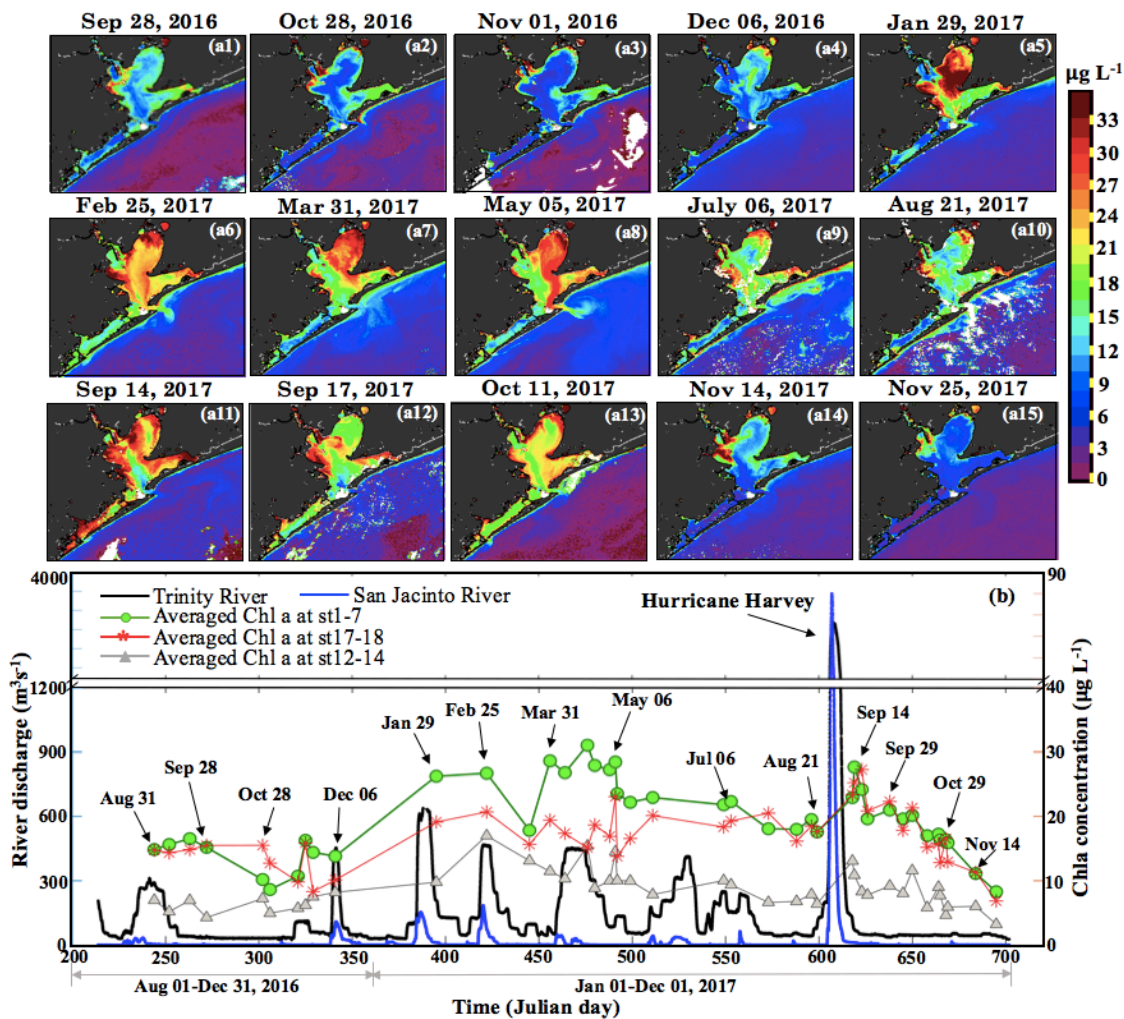

550

551 **Figure 11.** (a<sub>1-15</sub>) OLCI-derived Chl a shown for the period of August 31, 2016-November 25, 2017. (b)  
 552 Trinity River discharge at Romayor, Texas (USGS 08066500, black line) and the west flank of the San  
 553 Jacinto River (USGS 08067650; blue line); the green, red and gray lines/symbols represent the mean of  
 554 Chl a at stations 1-7 in Trinity Bay, at stations 17-18 in East Bay and at stations 12-14 close to the

555 entrance of GB corresponding to 43 cloud free Sentinel 3A-OLCI images (colored symbols; dated  
556 symbols correspond to images a<sub>1-15</sub>).

### 557 3.2.3 Reconstruction of Total Pigment Absorption Spectra from OLCI-derived Chl a

558 The reconstructed  $a_{\text{pig}}(\lambda)$  based on the third order function of Chl a<sub>HPLC</sub> (gray lines; Fig. 12a and b)  
559 agreed well with the spectrophotometrically measured  $a_{\text{pig}}(\lambda)$  (black lines; Fig. 12a and b) during both  
560 surveys ( $R^2=0.86$ ; Fig. 12c). The  $R^2$  for modeled versus measured  $a_{\text{pig}}(\lambda)$  are between 0.76 and 1.00 from  
561 400 to 700 nm with averaged  $R^2$  of whole spectra reaching  $\sim 0.82$  on September 29, 2017 and  $\sim 0.89$  on  
562 October 29-30, 2017, respectively. The vector coefficients  $C = [C_3, C_2, C_1, C_0]$  obtained from Eq. (11)  
563 were further applied to Eq. (12) to generate  $a_{\text{pig\_OLCI}}(\lambda)$  based on OLCI-derived Chl a images on July 06  
564 (Fig. 11a<sub>9</sub>), September 29 (Fig. 10a), October 29-30 (Fig. 10b-c), and Nov 25 (Fig. 11a<sub>15</sub>), 2017,  
565 respectively; these contained  $259 \times 224$  pixels in each image. The  $a_{\text{pig\_OLCI}}(\lambda)$  at each pixel was retrieved  
566 at 1 nm interval, and thus 301 images of  $a_{\text{pig\_OLCI}}(\lambda)$  representing each wavelength were obtained over GB.

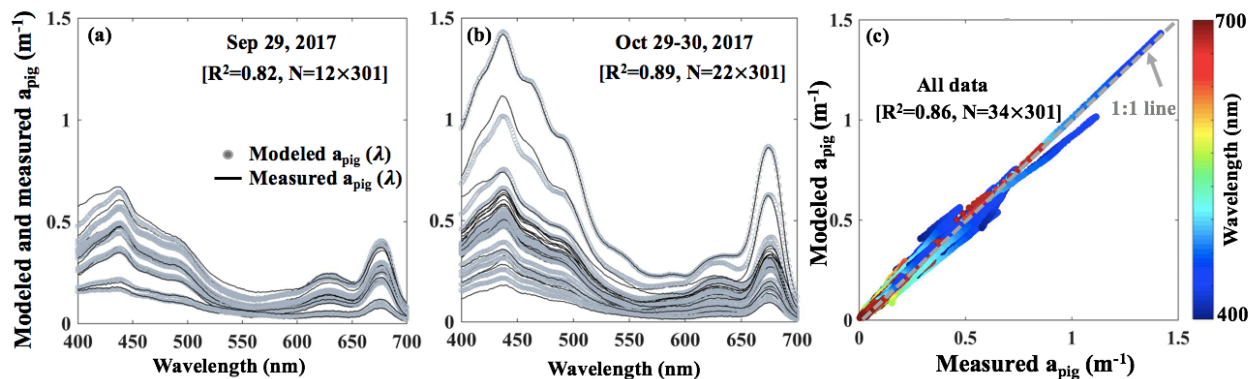

567  
568 **Figure 12.** Spectrophotometrically measured and multi-regression fitted  $a_{\text{pig}}(\lambda)$  spectra acquired on (a)  
569 September 29 and (b) October 29-30, 2017 in GB. Gray and black lines represent modeled and measured  
570 results, respectively. (c) Comparison between modeled and spectrophotometrically measured  $a_{\text{pig}}(\lambda)$  for  
571 all data with color representing wavelength.

### 572 3.2.4 Accuracy of phytoplankton pigment retrievals from Sentinel 3A-OLCI

573 The reconstructed  $a_{\text{pig\_OLCI}}(\lambda)$  was spectrally decomposed into 16 individual pigment spectra at each pixel  
574 based on Eq. (14). A comparison of HPLC-measured pigments to averaged NNLS inversion model  
575 retrieved pigments showed that  $R^2$  ranged from a low of 0.39 for violaxanthin to 0.98 for Chl a and mean  
576 error was in the range of 11.36%-60.98% (Table 4). The NNLS-modeled Chl a also correlated well with  
577 OLCI-derived Chl a ( $R^2=0.98$ ; Fig. 13a), with each exhibiting similar quantitative and spatial patterns.  
578 For the other 15 simultaneously simulated pigments, only 7 pigments averaged  $R^2$  value greater than 0.65  
579 (Table 4). Five NNLS-derived versus HPLC measured diagnostic pigments including alloxanthin, Chl b,  
580 zeaxanthin, fucoxanthin and peridinin are shown in Figure 13. The  $R^2$  between NNLS-derived and HPLC-  
581 measured pigments for surveys 1 and 2 was highest for alloxanthin (0.91; Fig. 13b). For the other  
582 pigments  $R^2$  was 0.78 for Chl b (Fig. 13c), 0.69 for zeaxanthin (Fig. 13d), 0.51 for fucoxanthin (Fig. 13e)  
583 and 0.50 for peridinin (Fig. 13f), respectively.

584 **Table 4.** Correlation between HPLC-measured pigment concentration with NNLS-modeled pigments.  
585

| Pigments           | Sep 29, 2017<br>(R <sup>2</sup> ) | Oct 29, 2017<br>(R <sup>2</sup> ) | Oct 30, 2017<br>(R <sup>2</sup> ) | Averaged<br>(R <sup>2</sup> ) | Mean error<br>(%) |
|--------------------|-----------------------------------|-----------------------------------|-----------------------------------|-------------------------------|-------------------|
| Chl a              | 0.95                              | 0.97                              | 0.98                              | 0.97                          | 11.36             |
| Chl b              | 0.76                              | 0.77                              | 0.95                              | 0.82                          | 24.58             |
| Chl c <sub>1</sub> | 0.56                              | 0.42                              | 0.79                              | 0.59                          | 34.23             |
| Chl c <sub>2</sub> | 0.49                              | 0.45                              | 0.74                              | 0.56                          | 31.13             |
| Pheophythin a      | 0.76                              | 0.79                              | 0.72                              | 0.75                          | 17.77             |
| Pheophythin b      | 0.75                              | 0.88                              | 0.76                              | 0.79                          | 15.65             |
| Peridinin          | 0.65                              | 0.48                              | 0.51                              | 0.54                          | 42.26             |
| Fucoxanthin        | 0.65                              | 0.45                              | 0.85                              | 0.60                          | 30.51             |
| Neoxanthin         | 0.55                              | 0.63                              | 0.79                              | 0.65                          | 31.13             |
| Lutein             | 0.61                              | 0.78                              | 0.72                              | 0.70                          | 32.54             |
| Violaxanthin       | 0.43                              | 0.34                              | 0.39                              | 0.39                          | 60.98             |
| Alloxanthin        | 0.81                              | 0.40                              | 0.91                              | 0.72                          | 32.90             |
| Diadinoxanthin     | 0.69                              | 0.40                              | 0.89                              | 0.66                          | 48.12             |
| Diatoxanthin       | 0.49                              | 0.43                              | 0.49                              | 0.47                          | 54.23             |
| Zeaxanthin         | 0.76                              | 0.65                              | 0.78                              | 0.73                          | 19.03             |
| β-carotenoid       | 0.41                              | 0.42                              | 0.82                              | 0.55                          | 44.02             |

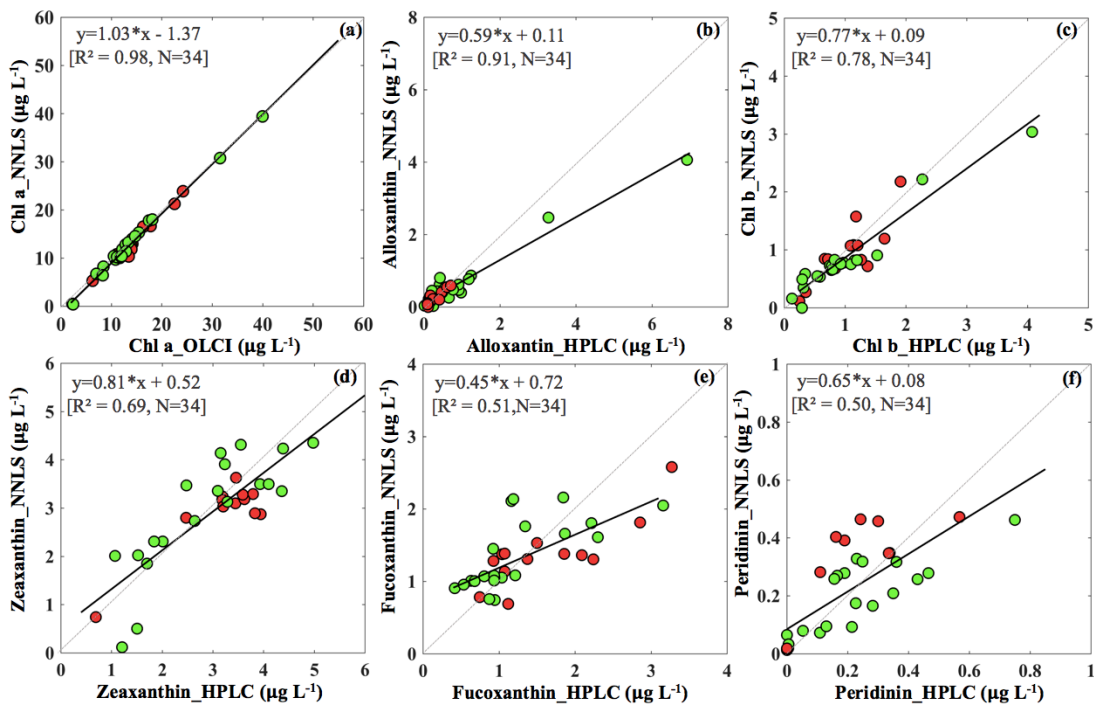

586

587 **Figure 13.** Sentinel-3A OLCI derived pigment concentration against HPLC measured pigment  
588 concentration in Galveston Bay; **a)** Chl a, **b)** alloxanthin, **c)** Chl-b, **d)** zeaxanthin, **e)** fucoxanthin, and **f)**  
589 peridinin.

### 590 3.3.1 Spatiotemporal Variations of Diagnostic Pigments

591 Flooding due to Hurricane Harvey not only enhanced Chl a, but also affect the phytoplankton pigments  
592 composition. NNLS-retrieved pigment maps in July, September, October, and November, 2017 including  
593 those of alloxanthin, chl b, zeaxanthin, fucoxanthin and peridinin (Fig. 14) showed different levels of  
594 variations before and after the hurricane event. Alloxanthin, which is unique to cryptophytes (Wright and  
595 Jeffrey, 2006) exhibited same spatial distribution patterns (Fig. 14a<sub>1</sub>-e<sub>1</sub>) with Chl a. Alloxanthin was

596 especially low ( $\sim 0.5 \mu\text{g L}^{-1}$ , Fig. 14a<sub>1</sub>) in the major basin area on July 06, 2017 before the hurricane and  
597 slightly elevated ( $\sim 0.7 \mu\text{g L}^{-1}$ , Fig. 14b<sub>1</sub>) in September and October, 2017 after the hurricane passage.  
598 Furthermore, extremely high alloxanthin ( $\sim 3.5 \mu\text{g L}^{-1}$ , Fig. 14c<sub>1</sub>-d<sub>1</sub>) was observed adjacent to San Jacinto  
599 River mouth on October 29-30, 2017, which coincided with the high %Chl a of cryptophyte at stations 19  
600 and 23 (Fig. 6b). The bloom with high concentration of alloxanthin on October 29, 2017 ( $\sim 3.5 \mu\text{g L}^{-1}$ ; Fig.  
601 14c<sub>1</sub>) then extended to a broader area on October 30, 2017 (Fig. 14d<sub>1</sub>).

603 Chl b is abundant in the group of chlorophyte (green algae) (Hirata et al., 2011) and the spatial  
604 distributions of Chl b (Fig. 14a<sub>2</sub>-e<sub>2</sub>) also showed strong correlations with Chl a on July 06, 2017,  
605 September 29, October 29-30 and November 25, 2017. The NNLS-derived Chl b exhibited overall low  
606 values ( $\sim 0.5\text{-}2 \mu\text{g L}^{-1}$ ; Fig. 14a<sub>2</sub>) before the hurricane and showed obvious elevation throughout bay after  
607 the hurricane and eventually decreasing to pre-hurricane level by November 25, 2017. Furthermore, Chl b  
608 concentrations observed on September 29, 2017 were higher than that on October 29-30, 2017, which  
609 corresponded to a decline of chlorophyte percentage derived from the IOP inversion algorithm (Fig. 6).  
610 More importantly, images obtained from IFCB at the entrance to GB also detected freshwater species  
611 Chlorophyte (*Pediastrum duplex*; Fig. 14g) on September 29, 2017. However, this species was rarely  
612 observed in IFCB images for the other dates (Fig. 14a<sub>1</sub> and Fig. 14c<sub>1</sub>-e<sub>2</sub>). In addition, Chl b concentrations  
613 approached  $\sim 2.8 \mu\text{g L}^{-1}$  in the bloom area and the corresponding green discoloration of water was also  
614 observed during the field survey on October 30, 2017.

615 Zeaxanthin is known as taxa-specific pigment for prokaryotes (cyanobacteria) (Moisan et al., 2017;  
616 Dorado et al., 2015) and NNLS-derived zeaxanthin maps (Fig. 14a<sub>3</sub>-e<sub>3</sub>) displayed significantly different  
617 patterns with Chl a, exhibiting low concentrations in the areas where the Chl a were high. For example,  
618 zeaxanthin was especially low in the bloom area on October 29-30, 2017, which agreed well with  
619 low %Chl a of cyanobacteria at stations 19 and 23 (Fig. 6), thus indicating that this localized algal bloom  
620 event was not associated with cyanobacteria. In addition, zeaxanthin was high  $\sim 3.0 \mu\text{g L}^{-1}$  (Fig. 14a<sub>3</sub>) in  
621 both GB and shelf waters on July 06, 2017 before the hurricane event. Later, zeaxanthin increased a  
622 slightly on September 29, 2017 (Fig. 14b<sub>3</sub>) with IFCB data detecting N<sub>2</sub>-fixing cyanobacteria (*Anabaena*  
623 spp.; Fig. 14g) and remained elevated on October 29-30, 2017 (Fig. 14b<sub>3</sub>-c<sub>3</sub>). Zeaxanthin eventually  
624 decreased to very low values ( $\sim 1.2 \mu\text{g L}^{-1}$ ; Fig. 14e<sub>3</sub>) on November 25, 2017.

625 Fucoxanthin is a major carotenoid found in diatoms (Hirata et al., 2011; Moisan et al. 2017) and the  
626 NNLS-derived fucoxanthin maps (Fig. 14a<sub>4</sub>-e<sub>4</sub>) showed highly similar distribution patterns with Chl a.  
627 Maps of fucoxanthin showed low concentrations on July 06, 2017 ( $\sim 1.5 \mu\text{g L}^{-1}$ ; Fig. 11a<sub>4</sub>), and displayed  
628 a large increase on September 29, 2017 ( $\sim 1.6\text{-}3.0 \mu\text{g L}^{-1}$ ; Fig. 11b<sub>4</sub>). Diatom group detected from IFCB  
629 were dominated by marine species before the hurricane, but subsequently shifted to freshwater species  
630 (e.g., *Pleurosigma*; Fig. 14g) and then back to marine species after October, 2017. Overall, fucoxanthin  
631 concentrations in GB were relatively higher during survey 1, which corresponded to the higher %Chl a of  
632 diatom (Fig. 6) compared to survey 2. Fucoxanthin continuously decreased to low values on November  
633 25, 2017 ( $\sim 1.6 \mu\text{g L}^{-1}$ ; Fig. 11e<sub>4</sub>), but accounted for higher fraction of phytoplankton diagnostic pigments  
634 compared to other dates in July, September and October, 2017.

635  
636 Peridinin, a primary bio-marker pigment for certain dinoflagellates (Örnólfsson et al., 2003), also  
637 displayed significantly distinct patterns in comparison to Chl a (Fig. 14a<sub>5</sub>-e<sub>5</sub>). On July 06, 2017, peridinin  
638 was  $\sim 0.24\text{-}0.36 \mu\text{g L}^{-1}$ , accounting for high proportion of the diagnostic pigments; meanwhile, diversity of  
639 marine dinoflagellate species observed from IFCB at this time was as also high (Fig. 14f). However,  
640 peridinin decreased ( $\sim 0.001\text{-}0.05 \mu\text{g L}^{-1}$ ) after the hurricane, with freshwater dinoflagellate species  
641 (*Ceratium hirundinella*; Fig. 14g) detected from IFCB on September 29, 2017. In addition, maps of  
642 peridinin during both surveys (Fig. 14b<sub>5</sub>-d<sub>5</sub>) presented higher concentration ( $\sim 0.3 \mu\text{g L}^{-1}$ ) in higher salinity  
643 waters adjacent to the bay entrance, which agreed well with the increasing fraction of dinoflagellate at

644 station 10-14 detected from IOP inversion model (Fig. 6). In contrast, peridinin showed low  
 645 concentrations in both GB and shelf waters (Fig. 14e<sub>5</sub>), with dinoflagellate species rarely observed from  
 646 IFCB on November 25, 2017 (Fig. 14l).

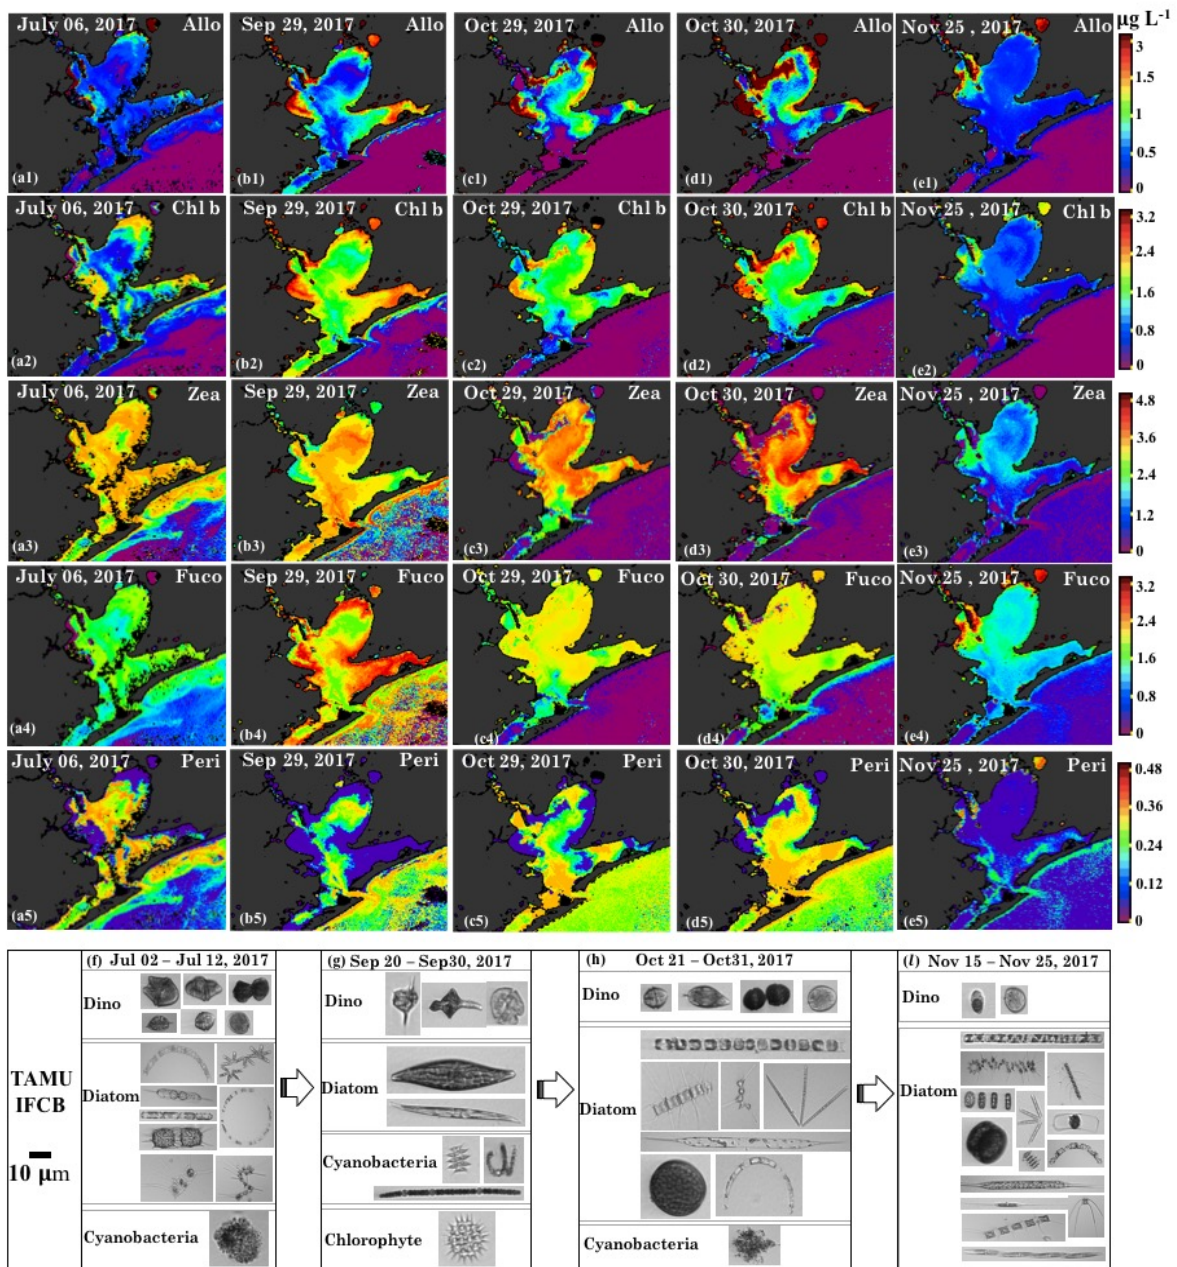

647 **Figure 14.** Sentinel-3 OLCI derived maps of diagnostic pigments for Galveston Bay. Simulated **a1-e1)**  
 648 alloxanthin, **a2-e2)** Chl b, **a3-e3)** zeaxanthin, **a4-e4)** fucoxanthin, and **a5-e5)** peridinin concentrations. a, b, c, d and e represent columns (maps for **July 06**, September 29, October 29-30 and **November 25, 2017**)  
 650 and 1-5 represent rows (pigments), respectively; **(f)**, **(g)**, **(h)** and **(l)** are the corresponding IFCB data for **July 06**, September 29, October 29-30 and November 25, 2017, respectively; note that IFCB pictures of  
 651 fresh water species including chlorophyte and cyanobacteria that appeared on September 20-30, 2017  
 652 have been zoomed in for better clarity.  
 654

## 655 4 Discussion

### 656 4.1 Performance of the Semi-Analytical IOP Inversion Algorithm

657 The residuals between  $R_{rs\_insitu}$  and  $R_{rs\_mod}$  on September 29 and October 29-30, 2017, are negative in the  
658 blue (400-450 nm) and red (610-630 nm) spectral range at most stations, whilst keeping positive  $\sim 700$  nm,  
659 which could be attributed to a number of factors. First, the underestimation near 700 nm by the IOP  
660 inversion model is possibly induced by the absence of a fluorescence component in the IOP inversion  
661 model; thus,  $R_{rs\_insitu}$  containing fluorescence signals were generally higher than  $R_{rs\_mod}$  near 700 nm.  
662 Second, in the range of 610-630 nm, the absorption was overestimated at most of the stations; in this  
663 spectral range, the shape of spectra was strongly modulated by cyanobacteria absorption. Thus this  
664 overestimation  $\sim 620$  nm is likely introduced by the input absorption spectrum (eigenvector) for  
665 cyanobacteria since all of input  $a_{phi}^*(\lambda)$  are general absorption spectral shapes for different phytoplankton  
666 groups. However, the spectra of  $a_{phi}^*(\lambda)$  can vary in magnitude and shape associated with package effects  
667 under different environmental conditions (e.g. nutrient, light and temperature) even for the same species  
668 (Bricaud et al., 2004). More detailed absorption spectra of phytoplankton under different conditions (e.g.  
669 high/low light and nutrient) could improve the performance of the IOP algorithm. Furthermore, the role of  
670 scattering might be another key factor to explain differences between  $R_{rs\_insitu}$  and  $R_{rs\_mod}$  for the whole  
671 spectra. The quantity and composition of suspended materials including phytoplankton, sediment and  
672 minerals will collaboratively determine  $b_{bp}(\lambda)$  in both shape and magnitude. However, the input  
673 eigenvector of  $b_{bp}(\lambda)$  in the present study was not divided into detailed sub-constituents and was a sum  
674 spectrum based on a power law function (Table 2). In reality,  $b_{bp}(\lambda)$  spectra are not smooth and regular,  
675 and thus, the  $b_{bp}(\lambda)$  value of phytoplankton and sediment might introduce errors to the whole spectrum  
676 due to their own scattering characteristics.

### 677 4.2 Distributions of NNLS-Retrieved Phytoplankton Pigments from Sentinel-3A OLCI

678 The derived maps of phytoplankton diagnostic pigments appeared to be reasonably correlated with  
679 HPLC-measured diagnostic pigments and showed overall agreement with extracted phytoplankton  
680 taxonomic compositions detected from the IOP inversion algorithm. The retrieved diatom-specific  
681 fucoxanthin maps however, showed high concentrations compared to other pigments adjacent to the  
682 entrance (Fig. 13b<sub>4</sub> and c<sub>4</sub>), which contradicted with diatom %Chl a calculated from IOP inversion  
683 algorithm that Chl a fraction of diatom was relatively uniform at stations 12-14 (Fig. 6b). (Nair et al.,  
684 2008) concluded that fucoxanthin can occur in other phytoplankton types (e.g. raphidophyte and  
685 haptophyte). Fucoxanthin and/or fucoxanthin derivatives such as 19'-hexanoyloxyfucoxanthin can also  
686 replace peridinin as the major carotenoid in some dinoflagellates (e.g., *Karenia brevis*; Jeffrey and Vest,  
687 1997). The elevated contributions from groups of dinoflagellate, haptophyte and prochlorophyte adjacent  
688 to the entrance (stations 10-14; Fig. 6b) along with high concentrations of fucoxanthin likely suggest the  
689 presence of elevated fractions of haptophyte and dinoflagellate, and further implies that fucoxanthin is an  
690 ambiguous marker pigment for diatoms. This could also explain the poor correlation between  
691 inverted %Chl a and %DP observed for the groups of diatom and haptophyte (Fig. 4g and l). These results  
692 also further suggest the inherent limitations of using DP-type comparison between major biomarker  
693 pigments and phytoplankton groups because the major assumption for DP-type methods is that diagnostic  
694 pigment of distinct phytoplankton groups are uncorrelated to each other. This assumption is invalid in that  
695 concentrations of major biomarker pigments are significantly correlated with each other and also may  
696 vary in time and space under some external environmental stress (e.g., temperature, salinity, mixing, light  
697 and nutrient) (Latasa and Bidigare, 1998).

698 Chl a concentration is another crucial factor that influences the accuracy of retrieved pigments. The goal  
699 of the empirical Chl a algorithm for Sentinel 3A-OLCI is to obtain more accurate estimation of surface

700 Chl a concentration, which is better for retrieving other accessory pigments. However, the primary  
701 limitation of Chl a empirical algorithms in this study was that the derived relationships between Red/NIR  
702 and Chl a in GB may only be valid within a specific time period due to temporally-limited field  
703 observations versus highly dynamic estuarine environments. Therefore, a Chl a empirical algorithm that is  
704 more broadly applicable over a longer time period will largely improve the accuracy of retrieved  
705 pigments over a series of remote sensing images and can be more useful for spatiotemporal studies of  
706 phytoplankton functional diversity. In addition, the similarity of many carotenoid absorption spectra  
707 could as well introduce errors when applying spectral decomposition techniques. Thus, the 16 input  
708 pigment spectra used in this study were selected from Thrane et al., 2015, which were correctly identified  
709 from unknown phytoplankton community structure with low error rate reported from Monte Carlo tests to  
710 minimize the potential effects of aliasing the spectra.

### 711 4.3 Response of Phytoplankton Taxa to Environmental Conditions

712 Previous studies showed diatoms to be the most abundant taxa in GB, and tend to be more dominant  
713 during winter/spring, corresponding to periods of high fresh water discharge and nutrient-replete  
714 conditions (Dorado et al., 2015; Örnólfsson et al., 2004a); transition from chain-forming diatoms such  
715 as *Chaetoceros* and rod-like diatoms pre-flood to small cells, such as *Thalassiosira* and small pennate  
716 diatoms were generally observed during high river discharge periods (Lee, 2017). In contrast,  
717 cyanobacteria were the most abundant species during the warmer months (Jun-Aug) when river discharge  
718 was relatively low (Örnólfsson et al., 2004b). Further, phytoplankton groups in GB responded  
719 differentially both taxonomically and spatially to the freshening events due to their contrasting nutrient  
720 requirements and specific growth characteristics. For instance, most phytoplankton taxa (e.g., diatom,  
721 chlorophyte and cryptophyte) can be positively stimulated by fresh inflows due to their relatively rapid  
722 growth rate (Paerl et al., 2003); however, Roelke et al. (2013) also documented that cyanobacteria and  
723 haptophytes in the upper GB were not sensitive to nutrient-rich waters from both rivers, due to the extra  
724 nutrients obtained from N<sub>2</sub>-fixation abilities and mixotrophic characteristics, respectively. In the lower  
725 part of GB, dinoflagellates and cyanobacteria are known to be more dominant during the low river  
726 discharge due to their preference for higher phosphorus (P) compared to some other groups, and to low  
727 turbulence (Lee, 2017) and thus, generally inversely related to the fresh inflows (Lee, 2017; Roelke et al.,  
728 2013).

729 Perturbations following Hurricane Harvey affected the phytoplankton taxonomic composition with  
730 alterations in phytoplankton community structure observed as the GB system transitioned from marine to  
731 freshwater then to marine system (Figs. 6 and 14). Higher fraction of zeaxanthin and peridinin and the  
732 presence of large and slow-growing marine dinoflagellates detected from IFCB pre-hurricane (July 06,  
733 2017) indicate that both cyanobacteria and dinoflagellates were the main groups of phytoplankton  
734 community during summer, and likely associated with warmer temperature and lower river flow (Lee,  
735 2017). Later, massive Chl a observed in September, 2017 and the decline of Chl a to background state in  
736 October, 2017, were likely associated with the hurricane-induced high river discharge and the resulting  
737 variations in nutrient concentration and composition. Higher fractions of diatom and chlorophyte  
738 accompanied with increasing fucoxanthin and Chl b on September 29, 2017, to some extent agreed well  
739 with measurements of Steichen et al., 2018 two weeks following Hurricane Harvey that freshwater  
740 species (diatom, green algae and cyanobacteria) appeared immediately following the flooding event.  
741 Greater abundance of diatom and chlorophyte during survey 1 in comparison to survey 2 were likely due  
742 to their rapid growth rates, enhanced nutrient uptake rates, and tolerance of low salinity and high  
743 turbulence under high nutrient loading conditions following the freshwater inflows (Roy et al., 2013;  
744 Santschi, 1995). Therefore, it is not surprising that Chl b concentrations showed very low values in July  
745 and November, 2017, when river discharge was correspondingly low. Cyanobacteria, which normally  
746 prefer low salinity conditions, also showed specific responses to this flood event. On September 29, 2017,



747 zeaxanthin slightly increased compared to summer season in July, 2017. The decline of diatoms and  
748 chlorophyte versus slightly increased cyanobacteria observed on October 29-30, 2017, could be attributed  
749 to the relatively slow growth rates of cyanobacteria compared to that of chlorophytes and diatom (Paerl et  
750 al., 2003); cyanobacteria appeared to have lagged behind these groups in terms of responding to enhanced  
751 freshwater discharge when longer residence times were again restored. In contrast, the presence of green  
752 algae and cyanobacteria could as well as be explained by the clarity and turbidity gradient of water. Quigg  
753 et al. (2010) reported that when turbidity was relatively high, chlorophyte dominated over cyanobacteria  
754 with biomass ratio of chlorophyte/cyanobacteria greater than 2, which supported our observations that  
755 chlorophyte dropped off whilst cyanobacteria increased during survey 2 on October 29-30, 2017. In  
756 addition, highest cyanobacteria percentage in East Bay suggest that calm and stratified waters may  
757 accelerate cyanobacteria growth as the buoyancy regulation mechanism of cyanobacteria is possibly  
758 restricted by the water mixing (Roy et al., 2013). Peridinin, which initially decreased in September and  
759 then increased in the lower GB on October 29-30, 2017, suggest that dinoflagellates showed overall  
760 preference for high-salinity waters. Furthermore, previous IFCB observations from Biological and  
761 Chemical Oceanography Data Management Office (BCO-DMO) showed that algal blooms after  
762 hurricanes in the nGOM were initially dominated by diatoms, and subsequently transitioned to blooms of  
763 dinoflagellates, likely associated with nutrient ratios and chemical forms of nutrient supplied by the flood  
764 waters and rainfall (Heisler et al., 2008). In addition, high concentrations of peridinin observed along the  
765 Houston Ship Channel, might provide evidence that the ballast water addition from shipping vessels  
766 likely promote harmful species of dinoflagellates (Steichen et al., 2015). Finally, low concentrations of all  
767 pigments on November 25, 2017 with relatively higher fraction of fucoxanthin compared to previous  
768 dates (Fig. 14), indicate the major role of marine diatoms at that time and further confirms that diatoms  
769 can be found under a wide range of inflows in GB.

770 The localized cryptophyte-chlorophyte bloom that occurred ~60d after Hurricane Harvey on October 29-  
771 30, 2017, was captured by both satellite and in-situ measurements. This bloom might not be associated  
772 with the flooding events of Hurricane Harvey, and could be linked to nutrient-rich runoff flowing into GB,  
773 reflecting sensitivity and rapid response of phytoplankton community to nutrient input in GB. In shallow  
774 and turbid estuaries, human activities are altering the environment and causing phytoplankton changes in  
775 diversity and biomass to occur more frequently. Dugdale et al. (2012) reported that variations of  
776 phytoplankton community in San Francisco estuary could be attributed to anthropogenically-elevated  
777 concentration of ammonium, which restrain the uptake of nitrate, thus reducing the growth and  
778 reproduction of larger diatoms and shifting towards smaller species (e.g., cryptophyte and green  
779 flagellate). Furthermore, 'pink oyster' events related to alloxanthin of cryptophyte in GB occurred more  
780 frequently from September through October in recent years (Paerl et al., 2003). The eastern side of  
781 Houston Channel in mid bay region was reported as the area most heavily impacted by the intense 'pink  
782 oyster' events. Previous studies and present observations both suggest that this cryptophyte-chlorophyte  
783 dominated bloom could be promoted by the nutrient-driven eutrophication from Houston Ship Channel,  
784 urbanization and industrialization along the upper San Jacinto River complex.

#### 785 **4.4 Photo-Physiological State of Natural Phytoplankton Community**

786 In this study, the CDOM-corrected  $F_V/F_M$  and  $\sigma_{PSII}$  likely represented a composite of both phytoplankton  
787 taxonomy and physiological stress (e.g., nutrient and mixing). Typically, lowest N and P concentrations  
788 were measured closest to the nGOM (Quigg et al., 2009). Phytoplankton community living close to  
789 nGOM were usually in poor nutrient conditions and would be expected to maximize their light harvesting  
790 (increase in  $\sigma_{PSII}$ ) due to nutrient stress. Simultaneously, phytoplankton cells might experience a decline  
791 of functional proportion of reaction centers of PSII (RCII), which means decrease in  $F_V/F_M$ . The observed  
792 low levels of  $F_V/F_M$  and Chl a/TP versus high values of  $\sigma_{PSII}$  and AP/TP adjacent to the nGOM showed  
793 agreement with previous studies that the fraction of carotenoids to be higher for nutrient-poor cultures

794 (Schütter et al., 1997; Holmboe et al., 1999). In contrast, phytoplankton in well-mixed waters (station 7-9)  
795 might experience abundant nutrients due to the resuspension of cyclonic gyre around Smith Points; as  
796 such, their photosynthetic machinery were likely healthier. Aiken et al. (2004) documented that the Chl  
797 a/TP ratio was relatively higher when plants were in good growing conditions, which is similar to the  
798 observations in this study that phytoplankton have higher fraction of Chl a accompanying higher rate of  
799 photosynthetic efficiency ( $F_v/F_m$ ) under nutrient replete conditions. Overall, the spatial pattern of  $F_v/F_m$   
800 and  $\sigma_{PSII}$  in GB could be mainly attributed to physiological stress of nutrient and hydrodynamics  
801 conditions since the light availability (PAR) during the sampling period did not spatially vary  
802 significantly at the surface. Furthermore, FIRE measurements ( $F_v/F_m$  and  $\sigma_{PSII}$ ) also presented a  
803 taxonomic signal super-imposed upon environmental factors. Each cluster with different dominant taxa  
804 (well mixed group, chlorophyte & cryptophyte, cyanobacteria, and dinoflagellate & haptophyte)  
805 displayed different physiological characteristics. The taxonomic sequence of eukaryotic groups from high  
806  $F_v/F_m$ , low  $\sigma_{PSII}$  to low  $F_v/F_m$ , high  $\sigma_{PSII}$  in the present observations showed potential effects of  
807 phytoplankton cell size corresponding to diatoms, chlorophyte, and cryptophyte, dinoflagellate and  
808 haptophyte. The prokaryote (cyanobacteria) had relatively high values of  $F_v/F_m$  and low values of  $\sigma_{PSII}$ ;  
809 this agreed with  $F_v/F_m$  for some species of nitrogen-fixing cyanobacteria that can range from 0.6 to 0.65  
810 (Berman-Frank et al., 2007). Yet, it is difficult to separate the contributions from environmental factors  
811 and taxonomic variations to the changes of FIRE fluorescence signals since all these parameters are inter-  
812 related. Different phytoplankton groups/sizes will display distinct physiological traits ( $F_v/F_m$  and  $\sigma_{PSII}$ )  
813 when experiencing considerable environmental pressures. Thus, effects of physiological stress on  
814  $F_v/F_m$  and  $\sigma_{PSII}$  variations for natural samples can only be determined when taxonomic composition can  
815 be excluded as a contributor (Suggett et al., 2009).

## 816 5 Conclusions

817 Field measurements (salinity, pigments, optical properties and physiological parameters) and ocean color  
818 observations from Sentinel-3A OLCI were used to study the effects of extreme flooding associated with  
819 Hurricane Harvey on the phytoplankton community structures, pigment distributions and their  
820 physiological state in GB. Flooding effects made the entire GB transition from saline to freshwater then  
821 back to a more marine influenced system. The band ratio (Red/NIR) of  $R_{rs\_in situ}$  were negatively correlated  
822 with HPLC-measured Chl a in an exponential relationship ( $R^2 > 0.93$ ). The satellite-retrieved Chl a maps  
823 yielded much higher Chl a concentration on September 29, 2017 compared to October 29-30, 2017 with  
824 lowest Chl a observed adjacent to the shelf waters. Phytoplankton taxonomic composition was further  
825 retrieved from  $R_{rs\_in situ}$  using a 10-species IOP inversion algorithm. Phytoplankton community generally  
826 dominated by estuarine marine diatoms/dinoflagellates before flood events, was altered to freshwater  
827 species of diatom, green algae (chlorophyte) and cyanobacteria during survey 1. It also showed an  
828 increase of small-size species including cryptophyte, haptophyte, prochlorophyte and cyanobacteria  
829 accompanied by a decline of chlorophyte and diatoms during survey 2.

830 Phytoplankton diagnostic pigments were retrieved using an NNLS inversion model based on Sentinel-3A  
831 OLCI Chl a maps also confirmed spatiotemporal variations of phytoplankton taxonomy. The NNLS-  
832 retrieved diagnostic pigment maps showed overall spatiotemporal agreement with HPLC measurements  
833 with  $R^2$  ranging from 0.39 (violaxanthin) to 0.98 (Chl a) during both surveys. Alloxanthin, Chl b, and  
834 fucoxanthin exhibiting similar patterns with Chl a, showed different levels of increase after Hurricane  
835 Harvey. In contrast, NNLS-derived zeaxanthin and peridinin presented significantly low values in the  
836 area where Chl a concentrations were high. Further, maps of zeaxanthin and peridinin displayed relatively  
837 higher fraction on July 06, 2017 before the hurricane compared to other diagnostic pigments. However,  
838 peridinin decreased post-hurricane on September 29, 2017 and then increased a bit on October 29-30,  
839 2017. Ultimately, concentration of Chl a and all biomarker pigments decreased to low levels in November,  
840 2017 when the typical environmental conditions of GB was restored.

841 Finally, the retrieved phytoplankton taxonomic compositions from IOP inversion algorithm were linked  
842 with FIRE-measured photosynthetic parameters ( $F_v/F_m$  and  $\sigma_{PSII}$ ) to assess the effects of physiological  
843 stress and taxonomic contributions on phytoplankton photosynthetic performance. An inverse relationship  
844 between the  $F_v/F_m$  and  $\sigma_{PSII}$  were observed during both surveys. Phytoplankton community in well-  
845 mixed waters (around Smith Point) showed high  $F_v/F_m$  against low  $\sigma_{PSII}$ ; in contrast, the area with poor  
846 nutrient conditions (adjacent to the shelf waters), showed low  $F_v/F_m$  and elevated  $\sigma_{PSII}$ . Taxonomic  
847 signatures of  $F_v/F_m$  and  $\sigma_{PSII}$  revealed diverse physiological characteristics with dinoflagellate-  
848 haptophyte group showing the lowest  $F_v/F_m$  versus the highest  $\sigma_{PSII}$ , whereas prokaryote of  
849 cyanobacteria-dominated group showed high values of  $F_v/F_m$  and low values of  $\sigma_{PSII}$ . Overall, this study  
850 using field and ocean color data combined with inversion algorithms provided novel insights on  
851 phytoplankton response to an extreme flood perturbation in a turbid estuarine environment based on  
852 taxonomy, pigment composition and physiological state of phytoplankton.

853

854 *Data availability.* Data from field measurements are available upon request from the corresponding  
855 author.

856

857 *Author contributions.* BL and ED conceived and designed the research; BL, ED and IJ collected and  
858 processed the data; BL analyzed the data and all authors contributed to writing the paper.

859

860 *Competing interests.* The authors declare that they have no conflict of interest.

861 *Acknowledgements.* The authors thank the European Space Agency (ESA) and the European Organization  
862 for Meteorological Satellites (EUMESAT) for providing access to the Sentinel-3 OLCI ocean color data  
863 and the Sentinel-3 Toolbox Kit Module (S3TBX) version 5.0.1 in Sentinel Application Platform (SNAP).  
864 We also would like to thank Phytoplankton Dynamics Lab of Texas A&M University, Galveston Campus,  
865 for the near-real time microplankton pictures recorded by an Imaging FlowCytobot, which are made  
866 available on the web. We are also grateful to Bill Gibson from the Coastal Studies Institute for providing  
867 logistic support for field operations. EJD acknowledges NASA support through grant No.  
868 80NSSC18K0177.

869

## 870 **References**

- 871 Acker, J., Lyon, P., Hoge, F., Shen, S., Roffer, M., and Gawlikowski, G.: Interaction of Hurricane Katrina with  
872 optically complex water in the Gulf of Mexico: interpretation using satellite-derived inherent optical properties  
873 and chlorophyll concentration, *IEEE Geosci. and Remote Sens. Lett.*, 6, 209-213, 2009.
- 874 Aiken, J., Fishwick, J., Moore, G., and Pemberton, K.: The annual cycle of phytoplankton photosynthetic  
875 quantum efficiency, pigment composition and optical properties in the western English Channel, *J. Mar. Biol.*  
876 *Assoc. U. K.*, 84, 301-313, 2004.
- 877 Alvain, S., Moulin, C., Dandonneau, Y., and Bréon, F.-M.: Remote sensing of phytoplankton groups in case 1  
878 waters from global SeaWiFS imagery, *Deep Sea Res., Part I*, 52, 1989-2004, 2005.
- 879 Barlow, R., Cummings, D., and Gibb, S.: Improved resolution of mono- and divinyl chlorophylls a and b and  
880 zeaxanthin and lutein in phytoplankton extracts using reverse phase C-8 HPLC, *Mar. Ecol. Progr. Ser.*, 161,  
881 303-307, 1997.
- 882 Behrenfeld, M. J., and Falkowski, P. G.: Photosynthetic rates derived from satellite-based chlorophyll  
883 concentration, *Limnol. Oceanogr.*, 42, 1-20, 1997.
- 884 Behrenfeld, M. J., and Kolber, Z. S.: Widespread iron limitation of phytoplankton in the South Pacific Ocean,  
885 *Science*, 283, 840-843, 1999.

886 Berman-Frank, I., Quigg, A., Finkel, Z. V., Irwin, A. J., and Haramaty, L.: Nitrogen-fixation strategies and Fe  
887 requirements in cyanobacteria, *Limnol. Oceanogr.*, 52, 2260-2269, 2007.

888 Bidigare, R. R., Ondrusek, M. E., Morrow, J. H., and Kiefer, D. A.: In-vivo absorption properties of algal  
889 pigments, *Ocean Optics X, Intl. Soc. Opt. Photonics.*, 1302, 290-303, 1990.

890 Blondeau-Patissier, D., Gower, J. F., Dekker, A. G., Phinn, S. R., and Brando, V. E.: A review of ocean color  
891 remote sensing methods and statistical techniques for the detection, mapping and analysis of phytoplankton blooms  
892 in coastal and open oceans, *Progr. Oceanogr.*, 123, 123-144, 2014.

893 Bracher, A., Taylor, M., Taylor, B., Dinter, T., Roettgers, R., and Steinmetz, F.: Using empirical orthogonal  
894 functions derived from remote sensing reflectance for the prediction of phytoplankton pigments concentrations,  
895 *Ocean Sci.*, 11, 139-158, 2015.

896 Brewin, R. J., Sathyendranath, S., Hirata, T., Lavender, S. J., Barciela, R. M., and Hardman-Mountford, N. J.: A  
897 three-component model of phytoplankton size class for the Atlantic Ocean, *Ecol. Modell.*, 221, 1472-1483, 2010.

898 Bricaud, A., Claustre, H., Ras, J., and Oubelkheir, K.: Natural variability of phytoplanktonic absorption in oceanic  
899 waters: Influence of the size structure of algal populations, *J. Geophys. Res. Oceans*, 109, C11010–1, 2004.

900 Campbell, D., Hurry, V., Clarke, A. K., Gustafsson, P., and Öquist, G.: Chlorophyll fluorescence analysis of  
901 cyanobacterial photosynthesis and acclimation, *Microbiol. Molecul. Biol. Rev.*, 62, 667-683, 1988.

902 Carder, K. L., Chen, F., Lee, Z., Hawes, S., and Kamykowski, D.: Semianalytic Moderate-Resolution Imaging  
903 Spectrometer algorithms for chlorophyll a and absorption with bio-optical domains based on nitrate-depletion  
904 temperatures, *J. Geophys. Res. Oceans*, 104, 5403-5421, 1999.

905 Chase, A., Boss, E., Zaneveld, R., Bricaud, A., Claustre, H., Ras, J., Dall’Olmo, G., and Westberry, T. K.:  
906 Decomposition of in situ particulate absorption spectra, *Meth. Oceanogr.*, 7, 110-124, 2013.

907 Chase, A., Boss, E., Cetinić, I., and Slade, W.: Estimation of phytoplankton accessory pigments from hyperspectral  
908 reflectance spectra: toward a global algorithm, *J. Geophys. Res. Oceans*, 122, 9725-9743, 2017.

909 Ciotti, A. M., Lewis, M. R., and Cullen, J. J.: Assessment of the relationships between dominant cell size in natural  
910 phytoplankton communities and the spectral shape of the absorption coefficient, *Limnol. Oceanogr.*, 47, 404-417,  
911 2002.

912 Cullen, J. J., and Davis, R. F.: The blank can make a big difference in oceanographic measurements, *Limnol.*  
913 *Oceanogr.*, 12, 29-35, 2003.

914 D’Sa, E. J., Lohrenz, S. E., Asper, V. L., and Walters, R. A.: Time series measurements of chlorophyll fluorescence  
915 in the oceanic bottom boundary layer with a multisensor fiber-optic fluorometer, *J. Atmos. Ocean. Technol.*, 14,  
916 889-896, 1997.

917 D’Sa, E. J., and Lohrenz, S. E.: Theoretical treatment of fluorescence detection by a dual-fiber-optic sensor with  
918 consideration of sampling variability and package effects associated with particles, *Appl. Optics*, 38, 2524-2535,  
919 1999.

920 D’Sa, E. J., Miller, R. L., and Del Castillo, C.: Bio-optical properties and ocean color algorithms for coastal waters  
921 influenced by the Mississippi River during a cold front, *Appl. Optics*, 45, 7410-7428, 2006.

922 D’Sa, E. J., Korobkin, M., and Ko, D. S.: Effects of Hurricane Ike on the Louisiana–Texas coast from satellite and  
923 model data, *Remote Sens. Lett.*, 2, 11-19, 2011.

924 D’Sa, E. J.: Assessment of chlorophyll variability along the Louisiana coast using multi-satellite data, *GISci. Remote*  
925 *Sens.*, 51, 139-157, 2014.

926 D’Sa, E. J., Joshi, I., and Liu, B.: Galveston Bay and coastal ocean optical- geochemical response to Hurricane  
927 Harvey from VIIRS ocean color, *Geophys. Res. Lett.*, 45, 10579-10589, <https://doi.org/10.1029/2018GL079954>,  
928 2018.

929 Devred, E., Sathyendranath, S., Stuart, V., and Platt, T.: A three component classification of phytoplankton  
930 absorption spectra: Application to ocean-color data, *Remote Sens. Environ.*, 115, 2255-2266, 2011.

931 Dierssen, H. M., Kudela, R. M., Ryan, J. P., and Zimmerman, R. C.: Red and black tides: Quantitative analysis of  
932 water-leaving radiance and perceived color for phytoplankton, colored dissolved organic matter, and suspended  
933 sediments, *Limnol. Oceanogr.*, 51, 2646-2659, 2006.

934 Doerffer, R., and Schiller, H.: The MERIS Case 2 water algorithm, *Intl. J. Remote Sens.*, 28, 517-535, 2007.

935 Dorado, S., Booe, T., Steichen, J., McInnes, A. S., Windham, R., Shepard, A., Lucchese, A. E., Preischel, H.,  
936 Pinckney, J. L., and Davis, S. E.: Towards an understanding of the interactions between freshwater inflows and  
937 phytoplankton communities in a subtropical estuary in the Gulf of Mexico, *PLoS One*, 10, e0130931, 2015.

938 Dugdale, R., Wilkerson, F., Parker, A. E., Marchi, A., and Taberski, K.: River flow and ammonium discharge  
939 determine spring phytoplankton blooms in an urbanized estuary, *Estuar. Coast. Shelf Sci.*, 115, 187-199, 2012.

940 Dutkiewicz, S., Hickman, A. E., Jahn, O., Gregg, W. W., Mouw, C. B., and Follows, M. J.: Capturing optically  
941 important constituents and properties in a marine biogeochemical and ecosystem model, *Biogeosciences*, 12, 4447-  
942 4481, 2015.

943 Farfan, L. M., D'Sa, E. J., and Liu, K.: Tropical cyclone impacts on coastal regions: the case of the Yucatan and the  
944 Baja California Peninsulas. *Mexico, Estuar. Coast.*, 37, 1388-1402, 2014.

945 Ficek, D., Kaczmarek, S. a., Stoń-Egiert, J., Wozniak, B., Majchrowski, R., and Dera, J.: Spectra of light absorption  
946 by phytoplankton pigments in the Baltic; conclusions to be drawn from a Gaussian analysis of empirical data,  
947 *Oceanologia*, 46, 533-555, 2004.

948 Fishwick, J. R., Aiken, J., Barlow, R., Sessions, H., Bernard, S., and Ras, J.: Functional relationships and bio-optical  
949 properties derived from phytoplankton pigments, optical and photosynthetic parameters; a case study of the  
950 Benguela ecosystem, *J. Mar. Biol. Assoc. U. K.*, 86, 1267-1280, 2006.

951 Garver, S. A., and Siegel, D. A.: Inherent optical property inversion of ocean color spectra and its biogeochemical  
952 interpretation: 1. Time series from the Sargasso Sea, *J. Geophys. Res., Oceans*, 102, 18607-18625, 1997.

953 Geider, R. J., La Roche, J., Greene, R. M., and Olaizola, M.: Response of the photosynthetic apparatus of  
954 *Phaeodactylum tricornutum* (bacillariophyceae) to nitrate, phosphate, or iron starvation, *J. Phycol.*, 29, 755-766, 1993.

955 Gilerson, A. A., Gitelson, A. A., Zhou, J., Gurlin, D., Moses, W., Ioannou, I., and Ahmed, S. A.: Algorithms for  
956 remote estimation of chlorophyll-a in coastal and inland waters using red and near infrared bands, *Opt. Express*, 18,  
957 24109-24125, 2010.

958 Gitelson, A.: The peak near 700 nm on radiance spectra of algae and water: relationships of its magnitude and  
959 position with chlorophyll concentration, *Int. J. Remote Sens.*, 13, 3367-3373, 1992.

960 Gordon, H. R., Brown, O. B., Evans, R. H., Brown, J. W., Smith, R. C., Baker, K. S., and Clark, D. K.: A  
961 semianalytic radiance model of ocean color, *J. Geophys. Res., Atmos.*, 93, 10909-10924, 1988.

962 Guthrie, C. G., Matsumoto, J., and Solis, R.: Analysis of the influence of water plan strategies on inflows and  
963 salinity in Galveston Bay, Final report to the United States Army Corps of Engineers, Contract #R0100010015.  
964 Texas Water Development Board, Austin, Texas, USA, 71 pp., 2012.

965 Heisler, J., Glibert, P. M., Burkholder, J. M., Anderson, D. M., Cochlan, W., Dennison, W. C., and Lewitus, A.:  
966 Eutrophication and harmful algal blooms: a scientific consensus, *Harmful Algae*, 8, 3-13, 2008.

967 Hirata, T., Aiken, J., Hardman-Mountford, N., Smyth, T. J., and Barlow, R. G.: An absorption model to determine  
968 phytoplankton size classes from satellite ocean colour, *Remote Sens. Environ.*, 112, 3153-3159, 2008.

969 Hirata, T., Hardman-Mountford, N., Brewin, R., Aiken, J., Barlow, R., Suzuki, K., Isada, T., Howell, E., Hashioka,  
970 T., Noguchi-Aita, M., and Yamanaka, Y.: Synoptic relationships between surface Chlorophyll-a and diagnostic  
971 pigments specific to phytoplankton functional types. *Biogeosciences*, 8, 311-327, 2011.

972 Hoepffner, N., and Sathyendranath, S.: Effect of pigment composition on absorption properties of phytoplankton,  
973 *Mar. Ecol. Progr. Ser.*, 73, 1-23, 1991.

974 Hoge, F. E., and Lyon, P. E.: Satellite retrieval of inherent optical properties by linear matrix inversion of oceanic  
975 radiance models: an analysis of model and radiance measurement errors, *J. Geophys. Res., Oceans*, 101, 16631-  
976 16648, 1996.

977 Holmboe, N., Jensen, H. S., and Andersen, F. Ø.: Nutrient addition bioassays as indicators of nutrient limitation of  
978 phytoplankton in a eutrophic estuary, *Mar. Ecol. Progr. Ser.*, 186, 95-104, 1999.

979 Howarth, R. W., Marino, R., Lane, J., and Cole, J. J.: Nitrogen fixation in freshwater, estuarine, and marine  
980 ecosystems. 1. Rates and importance, *Limnol. Oceanogr.*, 33, 669-687, 1988.

981 Hu, C., Cannizzaro, J., Carder, K. L., Muller-Karger, F. E., and Hardy, R.: Remote detection of *Trichodesmium*  
982 blooms in optically complex coastal waters: Examples with MODIS full-spectral data, *Remote Sens. Environ.*, 114,  
983 2048-2058, 2010.

984 Hu, C., and Feng, L.: Modified MODIS fluorescence line height data product to improve image interpretation for  
985 red tide monitoring in the eastern Gulf of Mexico, *J. Appl. Remote Sens.*, 11, 012003, 2016.

986 Jeffrey, S., and Vest, M.: Introduction to marine phytoplankton and their pigment signatures, in: *Phytoplankton  
987 pigment in oceanography*, edited by: Jeffrey, S.W., Mantoura, R. F. C., and Wright, S. W., UNESCO Publishing,  
988 Paris, France, 37-84, 1997.

989 Joshi, I. D., and D'Sa, E. J.: Seasonal variation of colored dissolved organic matter in Barataria Bay, Louisiana,  
990 using combined Landsat and field data, *Remote Sens.*, 7, 12478-12502, 2015.

991 Joshi, I. D., D'Sa, E. J., Osburn, C. L., Bianchi, T. S., Ko, D. S., Oviedo-Vargas, D., Arellano, A. R., and Ward, N.  
992 D.: Assessing chromophoric dissolved organic matter (CDOM) distribution, stocks, and fluxes in Apalachicola Bay  
993 using combined field, VIIRS ocean color, and model observations, *Remote Sens. Environ.*, 191, 359-372, 2017.

994 Joshi, I. D., and D'Sa, E. J.: An estuarine tuned Quasi-Analytical Algorithm for VIIRS (QAA-V): assessment and  
995 application to satellite estimates of SPM in Galveston Bay following Hurricane Harvey. *Biogeosciences*, 15, 4065-  
996 4086, 2018.

997 Kolber, Z. S., Zehr, J., and Falkowski, P. G.: Effects of growth irradiance and nitrogen limitation on photosynthetic  
998 energy conversion in photosystem II, *Plant Physiol.*, 88, 923-929, 1988.

999 Kolber, Z. S., Prášil, O., and Falkowski, P. G.: Measurements of variable chlorophyll fluorescence using fast  
1000 repetition rate techniques: defining methodology and experimental protocols, *Biochim. Biophys. Acta (BBA)-*  
1001 *Bioenergetics*, 1367, 88-106, 1998.

1002 Latasa, M., and Bidigare, R. R.: A comparison of phytoplankton populations of the Arabian Sea during the Spring  
1003 Intermonsoon and Southwest Monsoon of 1995 as described by HPLC-analyzed pigments, *Deep Sea Res., Part II*,  
1004 45, 2133-2170, 1998.

1005 Lee, Z., Carder, K. L., Peacock, T., Davis, C., and Mueller, J.: Method to derive ocean absorption coefficients from  
1006 remote-sensing reflectance, *Appl. Optics*, 35, 453-462, 1996.

1007 Lee, Z., Carder, K. L., and Arnone, R. A.: Deriving inherent optical properties from water color: a multiband quasi-  
1008 analytical algorithm for optically deep waters, *Appl. Optics*, 41, 5755-5772, 2002.

1009 Lee, H. A.: Effects of Physical Disturbance on Phytoplankton Diversity and Community Composition in Galveston  
1010 Bay, TX, during an Extreme Flooding Event, *Diss.*, 2017.

1011 Lohrenz, S. E., Weidemann, A. D., and Tuel, M.: Phytoplankton spectral absorption as influenced by community  
1012 size structure and pigment composition *J. Plankton Res.*, 25, 35-61, 2003.

1013 Lutz, V. A., Sathyendranath, S., Head, E. J., and Li, W. K.: Changes in the in vivo absorption and fluorescence  
1014 excitation spectra with growth irradiance in three species of phytoplankton, *J. Plankton Res.*, 23, 555-569, 2001.

1015 Mackey, M., Mackey, D., Higgins, H., and Wright, S.: CHEMTAX-a program for estimating class abundances from  
1016 chemical markers: application to HPLC measurements of phytoplankton, *Mar. Ecol. Progr. Ser.*, 144, 265-283, 1996.

1017 Maritorena, S., Siegel, D. A., and Peterson, A. R.: Optimization of a semianalytical ocean color model for global-  
1018 scale applications, *Appl. Optics*, 41, 2705-2714, 2002.

1019 Moisan, T. A., Moisan, J. R., Linkswiler, M. A., and Steinhardt, R. A.: Algorithm development for predicting  
1020 biodiversity based on phytoplankton absorption, *Cont. Shelf Res.*, 55, 17-28, 2013.

1021 Moisan, T. A., Rufty, K. M., Moisan, J. R., and Linkswiler, M. A.: Satellite observations of phytoplankton  
1022 functional type spatial distributions, phenology, diversity, and ecotones, *Front. Mar. Sci.*, 4, 189, 2017.

1023 Moore, C. M., Suggest, D. J., Holligan, P. M., Sharples, J., Abraham, E. R., Lucas, M. I., Rippeth, T. P., Fisher, N.  
1024 R., Simpson, J. H., and Hydes, D. J.: Physical controls on phytoplankton physiology and production at a shelf sea  
1025 front: a fast repetition-rate fluorometer based field study, *Mar. Ecol. Progr. Ser.*, 259, 29-45, 2003.

1026 Moore, C. M., Suggest, D. J., Hickman, A. E., Kim, Y.-N., Tweddle, J. F., Sharples, J., Geider, R. J., and Holligan, P.  
1027 M.: Phytoplankton photoacclimation and photoadaptation in response to environmental gradients in a shelf sea,  
1028 *Limnology and Oceanography*, 51, 936-949, 2006.

1029 Morel, A., and Prieur, L.: Analysis of variations in ocean color 1, *Limnol. Oceanogr.*, 22, 709-722, 1977.

1030 Nair, A., Sathyendranath, S., Platt, T., Morales, J., Stuart, V., Forget, M.-H., Devred, E., and Bouman, H.: Remote  
1031 sensing of phytoplankton functional types, *Remote Sens. Environ.*, 112, 3366-3375, 2008.

1032 Örnólfsson, E. B., Pinckney, J. L., and Tester, P. A.: Quantification of the relative abundance of the toxic  
1033 dinoflagellate, *karenia brevis* (dinophyta), using unique photopigments, *J. Phycol.*, 39, 449-457, 2003.

1034 Örnólfsson, E. B., Lumsden, S. E., and Pinckney, J. L.: Nutrient pulsing as a regulator of phytoplankton  
1035 abundance and community composition in Galveston Bay, Texas, *J. Experiment. Mar. Biol. Ecol.*, 303, 197-220,  
1036 2004a.

1037 Örnólfsson, E. B., Lumsden, S. E., and Pinckney, J. L.: Phytoplankton community growth-rate response to nutrient  
1038 pulses in a shallow turbid estuary, Galveston Bay, Texas, *J. Plankton Res.*, 26, 325-339, 2004b.

1039 Paerl, H. W., Valdes, L. M., Pinckney, J. L., Piehler, M. F., Dyble, J., and Moisander, P. H.: Phytoplankton  
1040 photopigments as indicators of estuarine and coastal eutrophication, *AIBS Bull.*, 53, 953-964, 2003.

1041 Pan, X., Mannino, A., Russ, M. E., Hooker, S. B., and Harding Jr, L. W.: Remote sensing of phytoplankton pigment  
1042 distribution in the United States northeast coast, *Remote Sens. Environ.*, 114, 2403-2416, 2010.

1043 Pan, X., Mannino, A., Marshall, H. G., Filippino, K. C., and Mulholland, M. R.: Remote sensing of phytoplankton  
1044 community composition along the northeast coast of the United States, *Remote Sens. Environ.*, 115, 3731-3747,  
1045 2011.

1046 Quigg, A., Roelke, D., and Davis, S. E.: Freshwater inflows and the health of Galveston Bay: influence of nutrient  
1047 and sediment load on the base of the food web, Final report of the coastal coordination council pursuant to National  
1048 Oceanic and Atmospheric Administration Award No. NA07NOS4190144, Texas A&M University at Galveston,  
1049 Texas, USA, 49 pp., 2009.

1050 Quigg, A., Litherland, S., Phillips, J., and Kevekordes, K.: Phytoplankton productivity across Moreton Bay,  
1051 Queensland, Australia: the impact of water quality, light and nutrients on spatial patterns, in: Proceedings of the 13th  
1052 International Marine Biological Workshop, Moreton Bay, Queensland, Australia, 7-25 February, 2005, 355-372,  
1053 2010.

1054 Quigg, A. S.: Understanding the role of nutrients in defining phytoplankton responses in the Trinity-San Jacinto  
1055 Estuary, Final report to Interagency Cooperative Contract No. 1104831134, Texas A & M University at Galveston,  
1056 Texas, USA, 56 pp., 2011.

1057 Rayson, M. D., Gross, E. S., Hetland, R. D., and Fringer, O. B.: Time scales in Galveston Bay: An unsteady estuary,  
1058 *J. Geophys. Res., Oceans*, 121, 2268–2285, 2016.

1059 Ritchie, R. J.: Consistent sets of spectrophotometric chlorophyll equations for acetone, methanol and ethanol  
1060 solvents, *Photosynthesis Res.*, 89, 27-41, 2006.

1061 Roelke, D. L., Li, H.-P., Hayden, N. J., Miller, C. J., Davis, S. E., Quigg, A., and Buyukates, Y.: Co-occurring and  
1062 opposing freshwater inflow effects on phytoplankton biomass, productivity and community composition of  
1063 Galveston Bay, USA, *Mar. Ecol. Progr. Ser.*, 477, 61-76, 2013.

1064 Roesler, C. S., and Perry, M. J.: In situ phytoplankton absorption, fluorescence emission, and particulate  
1065 backscattering spectra determined from reflectance, *J. Geophys. Res., Oceans*, 100, 13279-13294, 1995.

1066 Roesler, C. S., and Boss, E.: Spectral beam attenuation coefficient retrieved from ocean color inversion, *Geophys.*  
1067 *Res. Lett.*, 30, 2003.

1068 Roesler, C. S., Etheridge, S. M., and Pitcher, G. C.: Application of an ocean color algal taxa detection model to red  
1069 tides in the Southern Benguela, in: Proceedings of the Xth International Conference on Harmful Algae, Florida Fish  
1070 and Wildlife Conservation Commission and Intergovernmental Oceanographic Commission of UNESCO, St.  
1071 Petersburg, Florida, USA, October, 2002, 303-305, 2003.

1072 Roy, E. D., White, J. R., Smith, E. A., Bargu, S., and Li, C.: Estuarine ecosystem response to three large-scale  
1073 Mississippi River flood diversion events, *Sci. Total Environ.*, 458, 374-387, 2013.

1074 Santschi, P. H.: Seasonality in nutrient concentrations in Galveston Bay, *Mar. Environ. Res.*, 40, 337-362, 1995.

1075 Sathyendranath, S., Aiken, J., Alvain, S., Barlow, R., Bouman, H., Bracher, A., Brewin, R., Bricaud, A., Brown, C.,  
1076 and Ciotti, A.: Phytoplankton functional types from Space, in: (Reports of the International Ocean-Colour  
1077 Coordinating Group (IOCCG); 15), International Ocean-Colour Coordinating Group, 1-156, 2014.

1078 Schindler, D. W.: Evolution of phosphorus limitation in lakes, *Science*, 196, 260–262, 1977.

1079 Schütöter, L., Riemann, B., and Søndergaard, M.: Nutrient limitation in relation to phytoplankton  
1080 carotenoid/chlorophyll a ratios in freshwater mesocosms, *J. Plankton Res.*, 19, 891-906, 1997.

1081 Smayda, T. J.: Harmful algal blooms: their ecophysiology and general relevance to phytoplankton blooms in the sea,  
1082 *Limnol. Oceanogr.*, 42, 1137–1153, 1997.

1083 Steichen, J. L., Denby, A., Windham, R., Brinkmeyer, R., and Quigg, A.: A tale of two ports: Dinoflagellate and  
1084 diatom communities found in the high ship traffic region of Galveston Bay, Texas (USA), *J. Coastal Res.*, 31(2),  
1085 407-416, 2015.

1086 Steichen, J. L., Windham, R., Hala, D., Kaiser, K., Labonte, J. M., Petersen, L. H., Bacosa, H., Bretherton, L.,  
1087 Kamalanathan, M., Setta, S., and Quigg, A.: Rapid physicochemical and biological assessment of Galveston Bay in  
1088 the wake of Hurricane Harvey, abstract#AI44D-3023, in: Ocean Sciences Meeting 2018, American Geophysical  
1089 Union, Portland, Oregon, USA, February, 2018.

1090 Stramski, D., Reynolds, R. A., Kaczmarek, S., Uitz, J., and Zheng, G.: Correction of pathlength amplification in the  
1091 filter-pad technique for measurements of particulate absorption coefficient in the visible spectral region, *Appl.*  
1092 *Optics*, 54, 6763-6782, 2015.

1093 Suggett, D. J., Warner, M. E., Smith, D. J., Davey, P., Hennige, S., and Baker, N. R.: Photosynthesis and production  
1094 of hydrogen peroxide by Symbiodinium (pyrrhophyta) phylotypes with different thermal tolerances 1, *J. Phycol.*, 44,  
1095 948-956, 2008.

1096 Suggett, D. J., Moore, C. M., Hickman, A. E., and Geider, R. J.: Interpretation of fast repetition rate (FRR)  
1097 fluorescence: signatures of phytoplankton community structure versus physiological state, *Mar. Ecol. Progr. Ser.*,  
1098 376, 1-19, 2009.

1099 Sun, D., Huan, Y., Qiu, Z., Hu, C., Wang, S., and He, Y.: Remote-sensing estimation of phytoplankton size classes  
1100 from GOCI satellite measurements in Bohai Sea and Yellow Sea, *J. Geophys. Res. Oceans*, 122, 8309-8325, 2017.

1101 Thrane, J.-E., Kyle, M., Striebel, M., Haande, S., Grung, M., Rohrlack, T., and Andersen, T.: Spectrophotometric  
1102 analysis of pigments: a critical assessment of a high-throughput method for analysis of algal pigment mixtures by  
1103 spectral deconvolution, *PloS one*, 10, e0137645, 2015.

1104 Wang, G., Lee, Z., Mishra, D. R., and Ma, R.: Retrieving absorption coefficients of multiple phytoplankton  
1105 pigments from hyperspectral remote sensing reflectance measured over cyanobacteria bloom waters, *Limnol.*  
1106 *Oceanogr., Meth.*, 14, 432-447, 2016.  
1107 Wright, S. W., and Jeffrey, S. W.: Pigment markers for phytoplankton production, in: *Marine organic matter:*  
1108 *biomarkers, isotopes and DNA*, *The Handbook of Environmental Chemistry*, edited by Volkman, J. K., Springer,  
1109 Berlin, Heidelberg, Germany, 71-104, 2006.
